1 Multiple molecular events determine stochastic cell fate switching in a eukaryotic  
2 bistable system

3  
4 Naomi Ziv<sup>1</sup>, Lucas R. Brenes<sup>1,2</sup>, Alexander Johnson<sup>1</sup>

5  
6 <sup>1</sup>Department of Microbiology and Immunology, University of California, San Francisco

7 <sup>2</sup>Present Address: Biology Graduate Program, Massachusetts Institute of Technology

8  
9

10 Eukaryotic transcriptional networks are often large and contain several levels of feedback  
11 regulation. Many of these networks exhibit bistability, the ability to generate and stably  
12 maintain two distinct transcriptional states and to switch between them. In certain  
13 instances, switching between cell states is stochastic, occurring in a small subset of cells  
14 of an isogenic population in a seemingly homogenous environment. Given the scarcity  
15 and unpredictability of switching in these cases, investigating the determining molecular  
16 events is challenging. White-opaque switching in the fungal species *Candida albicans* is  
17 a complex bistable eukaryotic system and can serve as an experimentally accessible  
18 model system to study characteristics important for bistability and stochastic cell fate  
19 switching. In standard lab media, switching is rare, and genetically identical cells  
20 maintain their cellular identity (either “white” or “opaque”) through thousands of cell  
21 divisions. By isolating populations of white or opaque cells and measuring switching  
22 frequencies, previous studies have elucidated the many differences between the two cell  
23 states and identified a set of transcriptional regulators needed for cell type switching. Yet  
24 little is known about the molecular events that determine the rare, stochastic switching  
25 events that occur in single cells. We use microfluidics combined with fluorescent  
26 reporters to directly observe rare switching events between the white and opaque states.  
27 We investigate the stochastic nature of switching by beginning with white cells and  
28 monitoring the activation of Wor1, a master regulator and marker for the opaque state, in  
29 single cells and throughout cell pedigrees. Our results indicate that switching requires  
30 two stochastic steps; first an event occurs that predisposes a lineage of cells to switch. In  
31 the second step, some but not all, of those predisposed cells rapidly express high levels of  
32 Wor1 and commit to the opaque state. To further understand the rapid rise in Wor1, we  
33 used a synthetic inducible system in *Saccharomyces cerevisiae* into which a controllable  
34 *C. albicans* Wor1 and a reporter for its transcriptional control region have been  
35 introduced. We document that Wor1 positive autoregulation is highly cooperative (Hill  
36 coefficient > 3), leading to rapid activation and producing an “all or none” rather than a  
37 graded response. Taken together, our results suggest that reaching a threshold level of a  
38 master regulator is sufficient to drive cell type switching in single cells and that an earlier  
39 molecular event increases the probability of reaching that threshold in certain small  
40 lineages of cells. Quantitative molecular analysis of bistability in the white-opaque circuit  
41 can serve as a model for the general understanding of complex circuits.

42  
43

## 43 Introduction

44

45 Transcription circuits, defined as transcription regulators and the DNA cis-regulatory  
46 sequences they bind, control the expression of genes and thereby define cellular identity.  
47 Cellular identity is not static; gene expression programs change in response to external  
48 and internal stimuli. Certain transcriptional networks can exhibit bistability, in which a  
49 biological system can toggle between two stable states. The best-characterized bistable  
50 circuits come from microbes, such as the cI-Cro circuit of phage lambda (Ptashne, 2011),  
51 the control of lactose utilization in *Escherichia coli* (Santillán & Mackey, 2008),  
52 competence in *Bacillus subtilis* (Maamar & Dubnau, 2005) and galactose utilization in  
53 *Saccharomyces cerevisiae* (Stockwell et al., 2015). Bistability has also been engineered  
54 in both prokaryotic and eukaryotic synthetic circuits (Gardner et al., 2000; Kramer et al.,  
55 2004; Wu et al., 2013) and is thought to underlie many instances of cell differentiation in  
56 multicellular organisms (Chickarmane et al., 2006; Graham et al., 2010; Park et al.,  
57 2012). The emergence of bistability depends on the presence of positive feedback  
58 regulation and non-linearity (such as cooperativity) within the feedback circuit, which  
59 can convert graded inputs into discontinuous switch-like outputs (Alon, 2007; Ferrell,  
60 2002; Smits et al., 2006). The output of a given circuit “diagram” however, is entirely  
61 dependent on the physical parameters of the components, such as dissociation constants  
62 and protein concentrations; even slight variations in circuit architecture or parameters can  
63 produce distinct outputs (Çağatay et al., 2009). Many questions remain concerning the  
64 functional properties and parameters of network motifs found in real biological systems,  
65 particularly those based on the large regulatory networks commonly found in eukaryotic  
66 organisms. A major challenge to experimentally investigating the functional role of the  
67 multiple feedback loops present in complex circuits is the limited ability to independently  
68 manipulate the different components. In order to understand the output of these large  
69 networks, it is necessary to integrate the analysis of individual motifs with an analysis of  
70 the network as a whole.

71

72 In some cases, switching between states depends on external signals, but in other cases  
73 switching between stable states appears stochastic, occurring in a subset of cells of an  
74 isogenic population in a seemingly homogenous environment. In microbes, stochastic  
75 phenotypic switching is often thought of in terms of adaptation to fluctuating  
76 environments (Acar et al., 2008; Kussell, 2005b), where there is a predicted optimal  
77 relationship between the frequency of stochastic switching and the frequency of  
78 environmental change. In pathogens, stochastic switching can create distinct  
79 subpopulations with different cell features, protecting against targeted host defense  
80 systems (Norman et al., 2015). Stochastic switching also occurs during development to  
81 create cellular diversity (Losick & Desplan, 2008). For example, photoreceptor patterning  
82 in the fly retina is based on a choice between cell states following the stochastic  
83 expression of a single transcription factor (Wernet et al., 2006). Understanding stochastic  
84 phenotype switching at a molecular level is challenging, in particular, identifying the  
85 early, seemingly random, initiating events that determine which cells will undergo  
86 switching.

87

88 To study the mechanism of stochastic switching between two stable transcription states,  
89 we investigate white-opaque switching in *Candida albicans*, a common component of the  
90 human gut microbiota but also an opportunistic pathogen causing life-threatening  
91 bloodstream infections (Kim & Sudbery, 2011). White and opaque cells differ in the  
92 expression of hundreds of genes resulting in drastic differences in cell morphology,  
93 metabolism, the ability to mate and interactions with the immune system (Ene et al.,  
94 2016; Lohse & Johnson, 2009; Miller & Johnson, 2002; Sasse et al., 2013; Tuch et al.,  
95 2010). A complex transcriptional network controls white-opaque switching, as many (at  
96 least seven) transcription factors are involved and are known to regulate one another, in a  
97 series of nested feedback loops (Hernday et al., 2013; Lohse et al., 2016; Zordan et al.,  
98 2007). The master regulator of white-opaque switching is Wor1, a transcription factor  
99 whose deletion disables switching (locking cells in the white state) and whose ectopic  
100 expression in white cells converts them *en masse* to opaque cells, even in the absence of  
101 other critical regulators (Lohse & Johnson, 2016; Zordan et al., 2006, 2007). Wor1 is  
102 differently regulated between the two cell states, with 40-fold higher expression in  
103 opaque cells. In common with the other regulators of white-opaque switching, the Wor1  
104 regulatory sequences (7KB upstream control region and 2KB 5'UTR) are some of the  
105 longest in the *C. albicans* genome (Tuch et al., 2010). Its complexity is reminiscent of  
106 enhancers from multicellular organisms, even exhibiting the phase transitions described  
107 for some mammalian enhancers (Frazer et al., 2020). Wor1 is positioned in the center of a  
108 network of multiple positive feedback loops, binding both its own promoter as well as  
109 those of both activators and repressors of the opaque cell state (Hernday et al., 2013;  
110 Zordan et al., 2007).

111  
112 In this work, we investigate the process of white-opaque switching at a single cell level.  
113 To do so, we developed two complementary quantitative approaches to study the  
114 molecular mechanisms underlying switching. The first is the use of microfluidics and  
115 fluorescent microscopy to follow switching in *C. albicans*, allowing us to quantify the  
116 activation of the master regulator Wor1 in pedigrees where both switching and non-  
117 switching cells are dividing. The second is the use of a synthetic inducible system in *S.*  
118 *cerevisiae* to investigate the function of white-opaque regulators and characterize specific  
119 regulatory interactions, such as Wor1 autoregulation. Our results reveal features of white-  
120 opaque switching that were unanticipated from previous “bulk” culture analyses and  
121 provide key insights into the mechanism behind stochastic switching.

122  
123  
124  
125

125 Results

126

127 *Observing white-opaque switching at a single cell level*

128

129 White-opaque switching has typically been studied by monitoring the formation of  
130 colony sectors after plating single cells on solid agar and allowing them to grow and form  
131 colonies of approximately  $10^6$  cells (FIGURE 1A, 1B, TABLE S1). A sector registers a  
132 switching event that took place in the past and reveals the stochastic nature of switching  
133 (e.g. sectors of different sizes in different colonies) but provides no insight into how the  
134 original cell that founded the sector differed from the surrounding cells and underwent  
135 switching. We set out to observe switching at a single cell level to understand how this  
136 process occurs. Using switching competent *C. albicans*  $\Delta$  diploid cells (METHODS),  
137 we took advantage of microfluidic plates that contain specialized barrier traps (FIGURE  
138 1C, METHODS). As the experiment begins, traps contain a few cells and, over time,  
139 these cells divide, eventually filling the trap. After approximately 12 hours, each trap  
140 holds ~400 cells. We continue imaging cells for an additional 12 hours, during which  
141 cells continue to divide in the trap, pushing excess cells out of the trap where they flow  
142 away. With this experimental set-up, we are able to observe thousands of divisions in  
143 each trap and, by monitoring many traps, capture detailed instances of stochastic white-  
144 opaque switching, even though these events are rare.

145

146 Wor1 is a master regulator of white-opaque switching and its expression is 40-fold higher  
147 in opaque cells compared to white cells (Zordan et al., 2006). We followed switching  
148 events in a strain homozygous for a Wor1-GFP fusion protein (FIGURE 1D, VIDEO 1).  
149 Microfluidic experiments that began with cells from white colonies did not have any  
150 visible GFP signal while those that began with cells from opaque colonies had uniformly  
151 high levels of GFP signal (FIGURE 1D, FIGURE S1). Using this strain allowed for the  
152 unambiguous identification of switching events as well as the quantification of the  
153 increase in Wor1 expression as cells transition between the white and opaque states.  
154 Although switching is still relatively rare and stochastic, strains containing the Wor1-  
155 GFP fusion switch at higher rates than wildtype cells (TABLE S1), which enabled  
156 observation of many independent switching events. GFP is known to form dimers at high  
157 concentrations (Phillips, 1997; Yang et al., 1996) and when we introduced the GFP  
158 A206K mutation (differentiated as mGFP below) to prevent dimerization (Zacharias,  
159 2002), white-opaque switching reverted to wildtype levels (TABLE S1). By visualizing a  
160 large number of traps, we were able to observe several switching events in the Wor1-  
161 mGFP fusion strain. Apart from the difference in switching frequency, the switching  
162 behavior (as described below) of the Wor1-mGFP fusion strain appeared identical to the  
163 Wor1-GFP strain. Most of our data therefore was obtained from the elevated switching  
164 strain with the low-switching strain used to validate it. As predicted from previous bulk  
165 culture experiments, once the Wor1-GFP fusion reached a high level, it was faithfully  
166 passed on to descendent cells, preserving the opaque state.

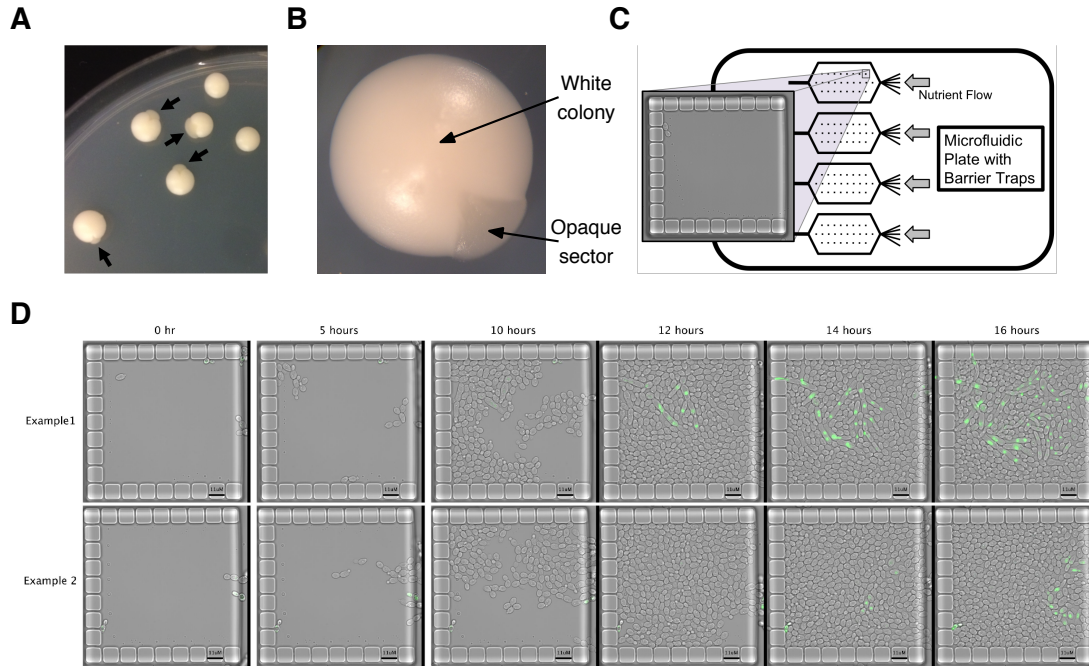

167  
168

169 FIGURE 1 legend – Monitoring white-opaque switching in *Candida albicans*  
170 A) Image of colonies produced by plating single white cells on solid agar. Arrows point  
171 to opaque sectors; each represents an independent switching event. This strain contains  
172 the Wor1-GFP fusion protein and hence exhibits higher than normal switching rates. B)  
173 Close up image of single white cell type colony with an opaque sector. C) Schematic of  
174 microfluidic plates used to study white-opaque switching at a single cell level. Each plate  
175 has four chambers; each chamber contains 104 barrier traps. D) Two examples of  
176 microfluidic traps in which a switching event occurred. The strain contains the Wor1-  
177 GFP fusion protein and cells enter the trap (from the right) as white cells. As cells  
178 complete switching to the opaque state, the Wor1-GFP fusion reaches high levels of  
179 expression.

180

181 VIDEO 1 legend – Example of time-lapse movie of a switching event  
182 Movie corresponds to ‘Example 1’ in FIGURE 1D. Movie is shown twice; in the second  
183 repetition, tracked cells are labeled. This strain contains the Wor1-GFP fusion protein.

184

185 *Observations on pseudohyphal growth and mitosis*

186

187 Consistent with a previous report (Bergen et al., 1990), we observed elongated cells  
188 reminiscent of pseudohyphae (Sudbery et al., 2004) as intermediates in some instances of  
189 white-opaque switching. Typically a round mother cell buds an elongated cell and both  
190 subsequently activate Wor1 (FIGURE 2, FIGURE S2). It is possible that pseudohyphal  
191 formation increases the probability of switching; however, it is not necessary or sufficient  
192 for switching as we observed pseudohyphal formation without switching and switching  
193 without pseudohyphal formation. In the majority of cases, descendents of initial

194 switching cells resemble typical opaque cells (which are slightly more elongated than  
195 white cells) within a few cell divisions.  
196

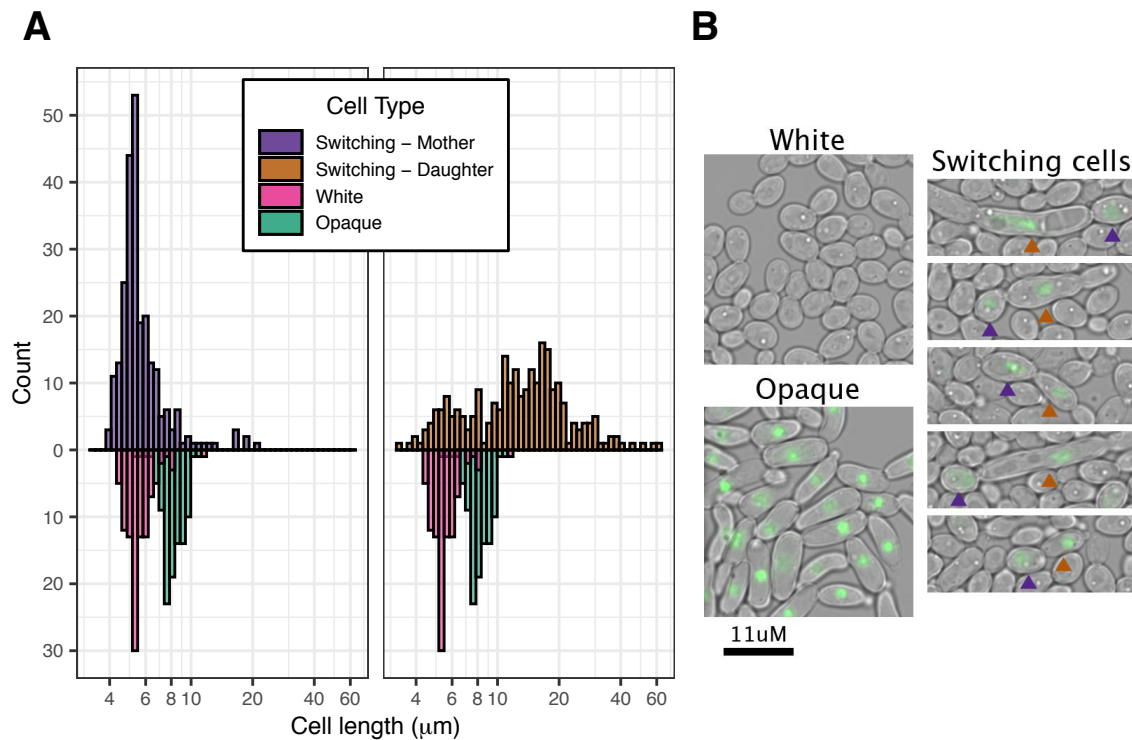

197  
198

199 **FIGURE 2 legend – Cell length distribution of switching cells**  
200 A) Cell length distribution of switching cells compared to typical white and opaque cells.  
201 Switching initiates in pairs of mother and daughter cells, the left histogram shows the size  
202 distribution for mothers, the right, for daughters. Typical white and opaque cell  
203 distributions are shown beneath each histogram for reference. The strain contains the  
204 Wor1-GFP fusion protein. X-axis is logarithmic B) Representative images of white,  
205 opaque and cells undergoing white to opaque switching. Arrows point out mother and  
206 daughter in each switching pair with colors corresponding to (A). Although elongated  
207 (pseudohyphal) cells are observed, they are neither necessary nor sufficient for switching.  
208

209 Although not a primary goal of this work, the nuclear localization of Wor1 allowed us to  
210 observe certain features of mitosis in switching cells. In a subset of cases, nuclear  
211 division occurred within the elongated daughter cell and not across the bud neck  
212 (FIGURE S3). Similar observations have been seen in filamentous forms of *C. albicans*  
213 (Sudbery et al., 2004). In some of our examples, one of the two nuclei in the daughter cell  
214 returned to the mother cell and both cells continued dividing (FIGURE S3A). In other  
215 examples, both nuclei remained in the elongated daughter forming polyploid cells  
216 (FIGURE S3B). In these cases, the mother cell no longer divided. This distinctive mitosis  
217 pattern did not always occur during switching and, as a result, the majority of opaque  
218 cells are not polyploid. Although we were able to observe these deviations from  
219 conventional mitosis, they are not required for switching, as we did not observe them in

220 all switching events. Furthermore, these atypical mitosis events are likely specific to *C.*  
221 *albicans* cells and do not represent a general feature of bistable systems.

222

223 *WOR1 activation is synchronous in mother-daughter pairs and is stereotypical across*  
224 *independent switching events*

225

226 To quantify switching, we developed a custom semi-automated image analysis pipeline to  
227 measure Wor1-GFP (or Wor1-mGFP) levels in single cells over time (FIGURE S4,  
228 METHODS). Because Wor1 is nuclear localized, we used the average of the 300 highest  
229 intensity pixels per cell as a quantitative measure of Wor1 levels. During switching,  
230 Wor1 levels increase and then oscillate in concert with nuclear divisions similar to those  
231 observed in established opaque cells (FIGURE 3A). Comparing Wor1 activation in  
232 mother cells of independent switching events (taken from different traps and  
233 experiments) reveals a generally stereotypical response (FIGURE 3B) taking  
234 approximately three hours to reach maximum Wor1 levels. Consistent with the stochastic  
235 nature of switching, the starting time of different switching events did not depend on the  
236 time (or number of cell divisions) from the beginning of the experiment. Moreover, even  
237 the time between the birth of a switching cell and its switching varies from one cell to the  
238 next.

239

240 As mentioned above, Wor1 activation occurs in dividing cells where both mother and  
241 daughter cells typically activate Wor1 simultaneously. This synchronous activation at  
242 times extends to the mother cells' previous daughter as well, leading to four cells  
243 (mother, two daughters and one granddaughter) activating Wor1 simultaneously  
244 (FIGURE 3C, 3D). The synchrony in Wor1 activation between mother and daughter cells  
245 suggest the pace of Wor1 activation is determined early in the switching event. Once high  
246 levels of Wor1 were reached, they were always inherited across subsequent cell divisions  
247 indicating that the switch was complete.

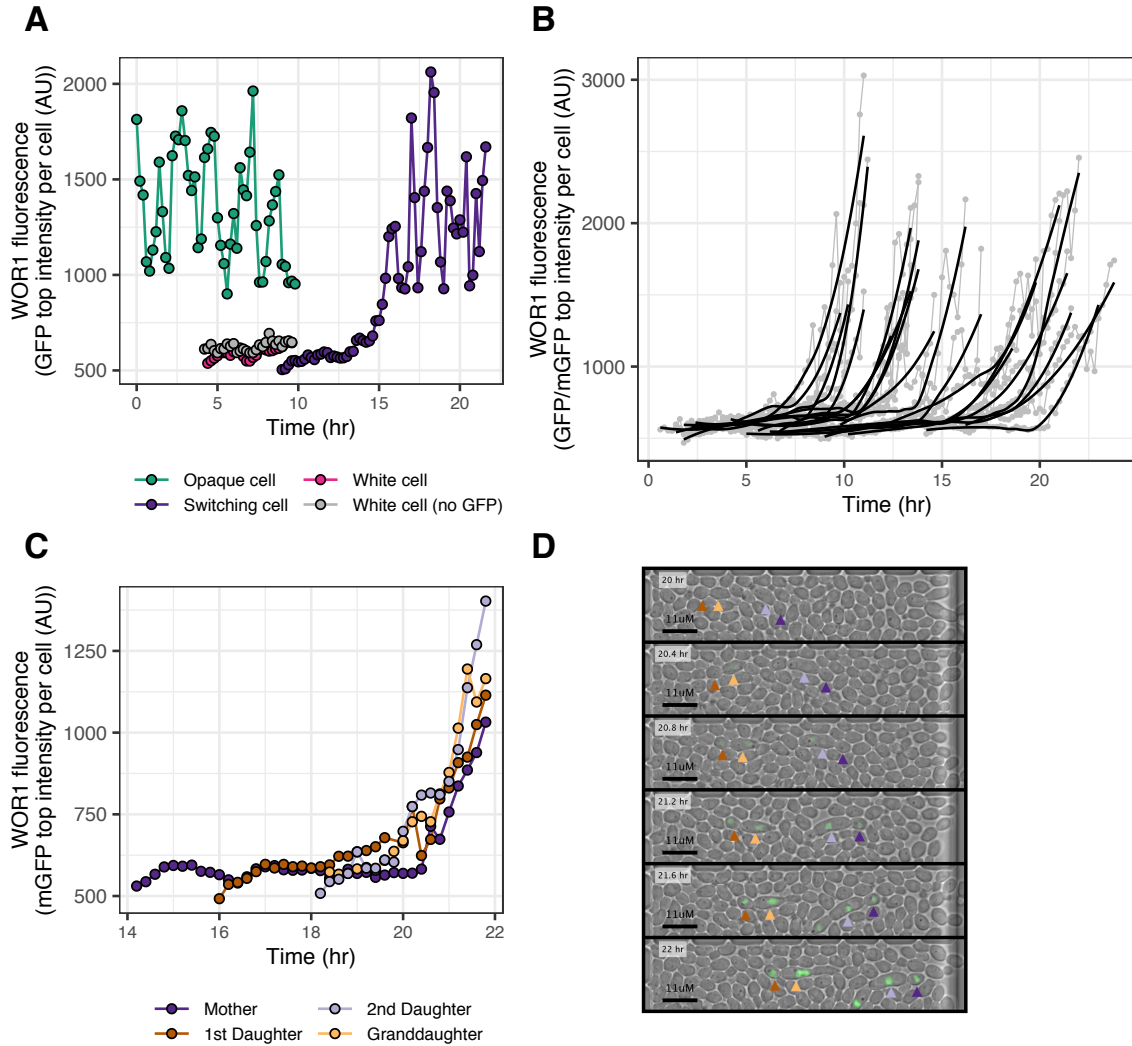

248  
249

250 FIGURE 3 legend – Wor1 fluorescence (GFP/mGFP) levels in single cells

251 A) Representative example of a Wor1 expression level trace in a single switching cell  
252 (purple). Traces of typical white (pink) and opaque (green) cells are shown for reference.  
253 Oscillations in high Wor1 levels occur with nuclear divisions. X-axis represents time  
254 from the beginning of the experiment; examples are taken from cells born at different  
255 times. The strain contains the Wor1-GFP fusion protein. B) Examples of Wor1 activation  
256 in single switching cells. Traces (grey points and lines) are truncated to highlight the  
257 initial activation of Wor1. Black lines represent locally estimated scatter-plot smoothing  
258 (LOESS) of individual traces. Examples are taken from three different experiments,  
259 representing strains containing the Wor1-GFP (n=17) or the Wor1-mGFP (n=4) fusion  
260 protein. C) Representative example of a four-cell (direct mother-daughter) pattern of  
261 synchronous Wor1 activation. X-axis represents time from the beginning of the  
262 experiment and traces are shown starting at the birth of the mother cell. The strain  
263 contains the Wor1-mGFP fusion protein. D) Subset of images representing data shown in  
264 (C) with time proceeding from top to bottom. Arrows point to individual cells with colors  
265 corresponding to (C). All four switching cells simultaneously activate Wor1.  
266



267 *Certain lineages of cells show unusual switching patterns*

268

269 An unanticipated feature of white-opaque switching emerged when we reconstructed  
270 complex pedigrees of switching cells, tracing the prior histories of cells destined to  
271 switch. In addition to the simple pairs of mother-daughter cells activating Wor1  
272 simultaneously described above, we observed instances where additional cells in the  
273 same trap also activated Wor1. Pedigree analysis revealed that these additional cells were  
274 closely related to the conventional mother-daughter switching pairs, through a previous  
275 mother, daughter or sister (FIGURE 4A). However, these related switching cells were  
276 separated by cell divisions that produced cells that did not switch, creating small mixed-  
277 fate pedigrees (FIGURE 4A).

278

279 To determine if these cases are the result of entirely independent switching events or are  
280 due to a complex pattern of switching within a single lineage, we analyzed the Wor1-  
281 mGFP strain, where overall switching rates are lower. We estimate the Poisson  
282 probability distribution for multiple switching events per trap based on the proportion of  
283 traps where there was no Wor1 activation (134/168 traps) (FIGURE 4B, METHODS).  
284 We find that the Poisson expectation (FIGURE 4B, white bars) of switching events is  
285 matched exactly when considering direct mother-daughter and mixed-fate pedigrees as  
286 single dependent switching events (Chi-squared goodness of fit p-value, 0.986),  
287 (FIGURE 4B, light grey bars). However, the expectation is not matched if direct mother-  
288 daughter pedigrees are considered dependent but mixed-fate pedigrees are considered two  
289 independent events (Chi-squared goodness of fit p-value, 0.0034), (FIGURE 4B, medium  
290 grey bars). This analysis rules out multiple independent events as the explanation for  
291 mixed-fate pedigrees and indicates that the switching events must be related to each  
292 other.

293

294 One common pattern of mixed-fate pedigree involved a mother cell budding three cells in  
295 succession (top-right pattern shown in FIGURE 4A). While the mother and the first and  
296 the third daughters ultimately activate Wor1, the second daughter does not (FIGURE 4C,  
297 4D, VIDEO 2). With the Wor1-GFP fusion protein, we also observe similar patterns,  
298 including an example where a subset of the decedents of the second daughter also  
299 activates Wor1 (FIGURE S5). These observations suggest that certain cells undergo a  
300 stochastic event that predisposes them and their direct descendents to a higher probability  
301 of switching than that observed in the general population. Whether or not cells in these  
302 pedigrees actually undergo switching appears to be determined by a second stochastic  
303 event. We do not know the basis of the first event (see discussion), but in the next  
304 sections, we further explore the second step in which certain cells rapidly increase Wor1  
305 expression.

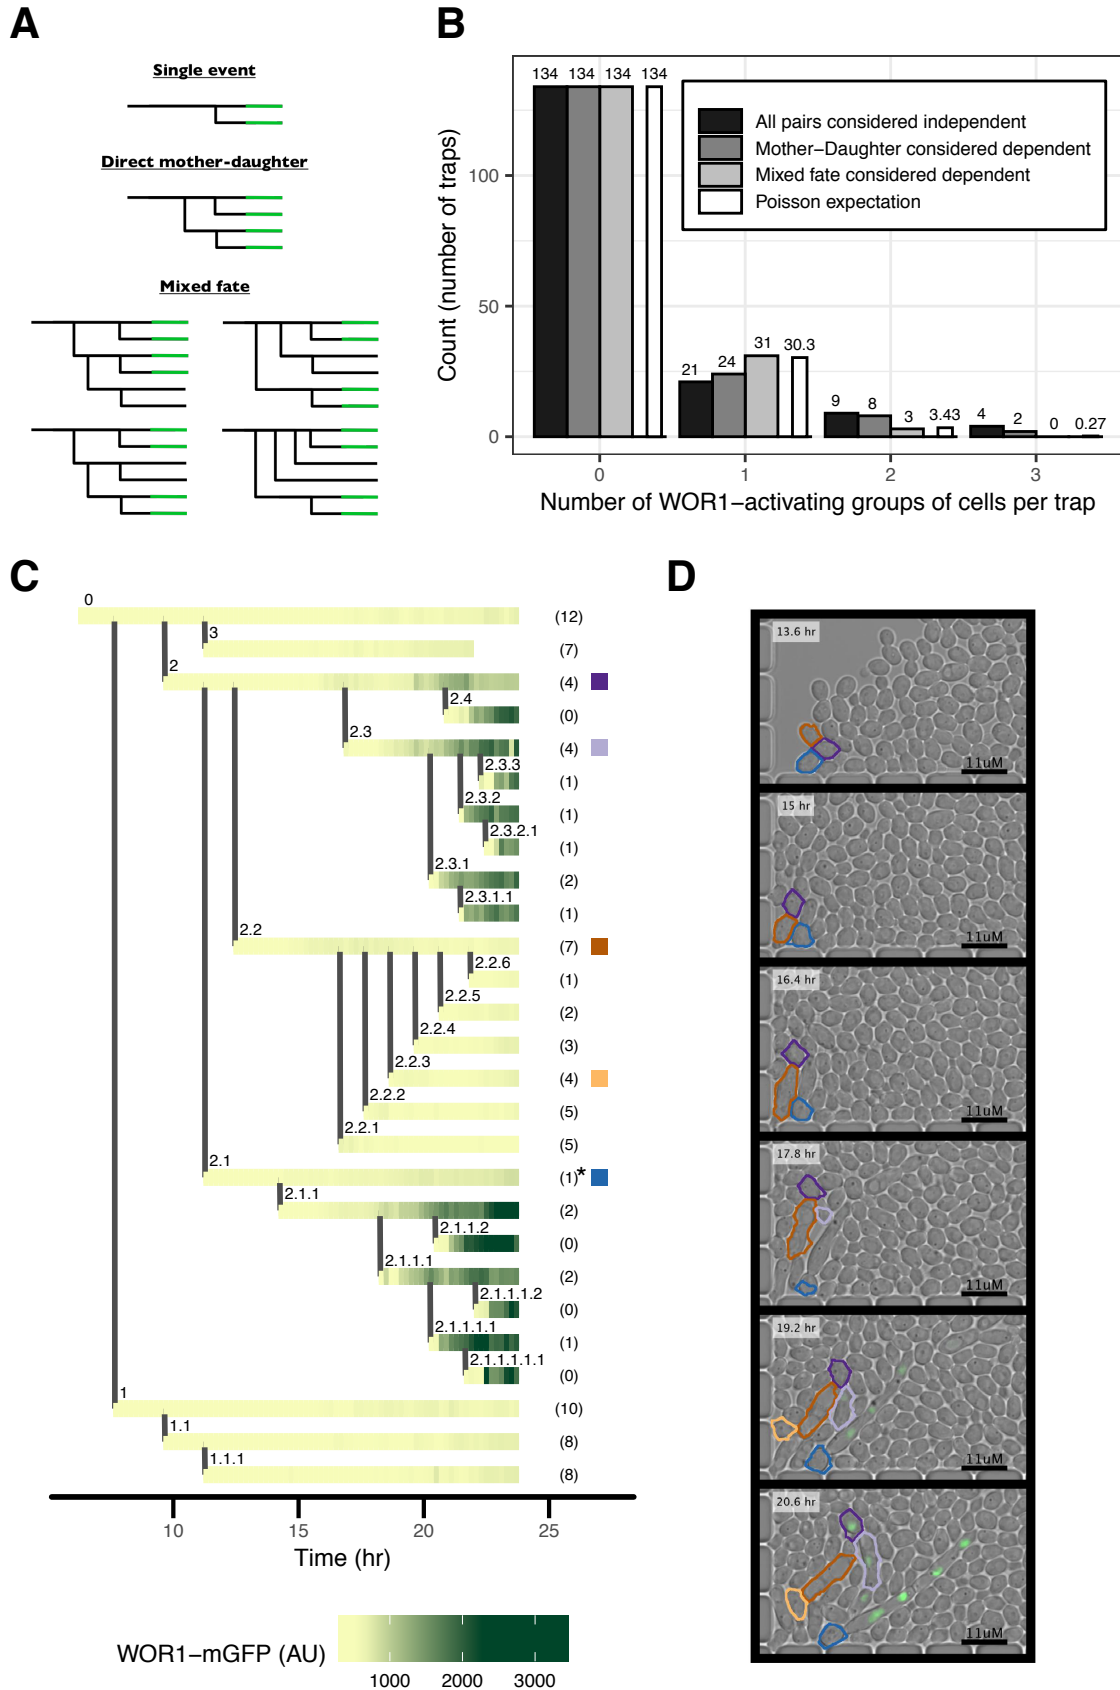

307 FIGURE 4 legend – Wor1 activation in pedigrees

308 A) Schematic of pedigree patterns of Wor1 activation, including several examples of  
309 mixed-fate pedigrees. Horizontal lines represent single cells; vertical lines represent  
310 budding of a daughter cell. Green color represents Wor1 activation. B) Comparison of  
311 distributions of the number of switching events per trap to Poisson expectation (white  
312 bars). Different distributions are based on including different classes of pedigree patterns  
313 as single dependent events. The strain contains the Wor1-mGFP fusion protein. C)  
314 Representative mixed-fate pedigree (top-right pattern shown in (A)). Horizontal lines  
315 represent single cells; vertical lines represent budding of a daughter cell. Every horizontal  
316 line is made up of small tiles representing the measured Wor1-mGFP fluorescence at that  
317 time. Numbers within parentheses on the right of the pedigree represent the number of  
318 budded daughter cells per cell within the time period shown; not all daughters are  
319 depicted in the pedigree. The cell marked by the asterisk lost its nucleus to its daughter  
320 cell. Colored square tiles on the right-hand side indicate individual cells that are depicted  
321 in (D) using the same color scheme. D) Subset of images representing data shown in (C)  
322 with time proceeding from top to bottom. Cell outlines are based on automated image  
323 analysis (METHODS).

324

325 VIDEO 2 legend – Example of time-lapse movie of a switching event containing a  
326 mixed-fate pedigree

327 Movie corresponds to example in FIGURE 4C. Movie is shown twice; in the second  
328 repetition, tracked cells are labeled. This strain contains the Wor1-mGFP fusion protein.

329

330 *Using a synthetic inducible system in Saccharomyces cerevisiae to investigate the*  
331 *properties of Wor1 autoregulation*

332

333 Wor1 has been shown to bind to its own control region and to activate its own  
334 expression. This positive feedback loop has been proposed to be a critical feature of  
335 white-opaque switching (Zordan et al., 2006). Consistent with this hypothesis, we found  
336 that the frequency of white-opaque switching is reduced when a single Wor1 motif (out  
337 of nine) from the Wor1 control region is deleted (TABLE S1, METHODS). In addition to  
338 Wor1, at least 7 other regulators bind the Wor1 control region (Hernday et al., 2013;  
339 Lohse & Johnson, 2016), which complicates studying Wor1 autoregulation directly in *C.*  
340 *albicans*. To study Wor1 autoregulation without these confounding factors, we set up the  
341 Wor1 autoregulatory loop using a synthetic biology approach (Aranda-Díaz et al., 2017;  
342 McIsaac et al., 2014). Specifically, we developed a system in *S. cerevisiae* where we can  
343 induce the expression of the *C. albicans* Wor1 protein with progesterone (METHODS,  
344 FIGURE 5A) and use flow cytometry to follow the activation of Wor1 transcription using  
345 a fluorescent reporter driven by the *C. albicans* Wor1 regulatory region (METHODS).

346

347 The 7KB control region (enhancer) of the *C. albicans* Wor1 was fused to the *S.*  
348 *cerevisiae* Cyc1 core promoter (METHODS) resulting in a reporter that was specifically  
349 activated by Wor1 expression (FIGURE S6). Using an mCherry fluorophore for the  
350 transcriptional reporter, we created independent (a or  $\alpha$  mating type) strains where levels  
351 of Wor1, Wor1-GFP, Wor1-mGFP or GFP could be controlled from a synthetic  
352 expression construct by adding hormone (METHODS). Comparing Wor1-GFP to Wor1-

353 mGFP is informative as the ability of GFP to dimerize is the basis for increased switching  
354 in *C. albicans* with Wor1-GFP (TABLE S1). As expected, GFP, Wor1-GFP and Wor1-  
355 mGFP fluorescence all increased in a hormone dependent manner when driven by the  
356 synthetic hormone dependent construct (FIGURE 5B left, FIGURE S7A). Despite  
357 identical transcriptional constructs, GFP was induced at ten fold higher levels than Wor1-  
358 GFP and Wor1-mGFP (FIGURE 5B left), possibly due to differences in mRNA or  
359 protein stability or to translational efficiency. Inducing Wor1 or its GFP fusions also  
360 caused physiological effects such as cell clumping, leading to increased autofluorescence  
361 (in the Wor1 strains) and bimodal induction distributions (in the Wor1-GFP strains). *S.*  
362 *cerevisiae* has two Wor1 homologs (*MIT1* and *ROF1*) with conserved DNA binding  
363 domains and motifs. We created strains where both homologs are deleted and found that  
364 the results did not change significantly. We present data for both sets of strains.

365

366 *Wor1 autoregulation is ultrasensitive and the effect of GFP dimerization informs*  
367 *potential mechanism for increasing switching frequency*

368

369 The Wor1 transcriptional reporter shows low levels of expression in the absence of  
370 hormone (FIGURE S7B). As hormone levels increase, the reporter is activated in strains  
371 where the hormone induces Wor1 or its GFP fusions but not when GFP alone is produced  
372 (FIGURE 5B right). In strains inducing Wor1-GFP and Wor1-mGFP, we could measure  
373 both the level of the fusion protein (via the GFP channel) and the response of the Wor1  
374 enhancer (via the mCherry channel) in single cells (FIGURE 5C, FIGURE S8A). To  
375 quantify the response function of Wor1 autoregulation, we fit four-parameter log-logistic  
376 functions (Hill equations) that describe S-shaped curves, to these distributions  
377 (METHODS, FIGURE 5C, 5D). The four parameters specify the lower horizontal  
378 asymptote, the upper horizontal asymptote, the value at which the response is half of the  
379 maximum and the Hill coefficient, which is a measure of the steepness of the response  
380 curve (ultrasensitivity). Hill coefficients greater than 1 imply cooperativity in gene  
381 regulation. As reporter expression gradually decreases at high hormone levels in strains  
382 containing Wor1-GFP, we only used a subset of conditions for fitting in these strains  
383 (METHODS, FIGURE S8A). All curves were ultrasensitive (FIGURE 5D) with mean  
384 Hill coefficient estimates of 3.2 (standard deviation, 0.4) for Wor1-mGFP and 4.3  
385 (standard deviation, 0.9) for Wor1-GFP. While there was a small but significant increase  
386 in cooperativity for Wor1-GFP over that of Wor1-mGFP (t.test p.value, 0.01), there was a  
387 striking difference in the level of protein required for half-max activation, with 5 times  
388 higher levels required for Wor1-mGFP than Wor1-GFP (t.test p.value, 8.04e-05). As the  
389 ability of GFP to dimerize most likely increases the effective amount of Wor1 found in  
390 dimers, the difference in activation thresholds suggests that Wor1 normally acts as a  
391 multimer to efficiently bind DNA. Wor1-GFP levels in *C. albicans* opaque cells are  
392 comparable to the levels of Wor1-GFP needed to activate the reporter in our synthetic *S.*  
393 *cerevisiae* system (FIGURE S8B), further indicating that the synthetic system captures  
394 features of the authentic *C. albicans* circuit.

**A**

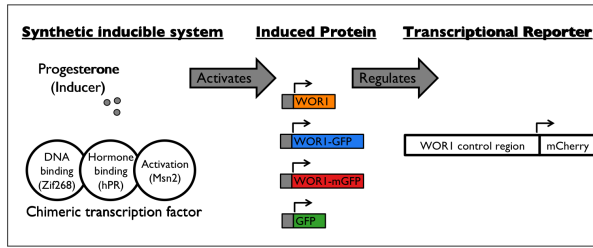

**B**

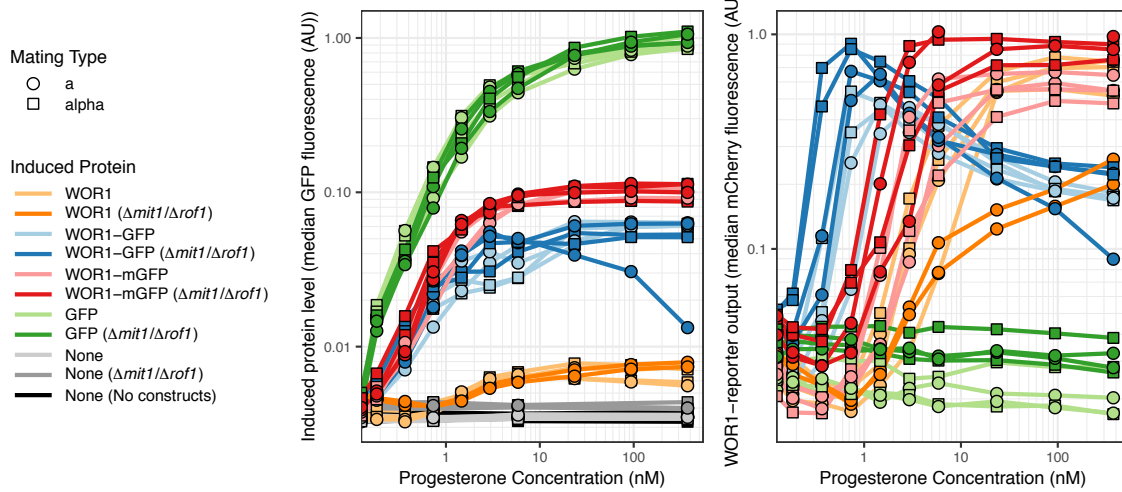

**C**

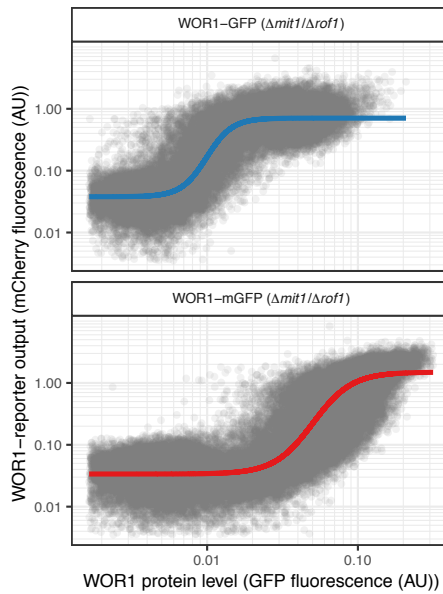

**D**

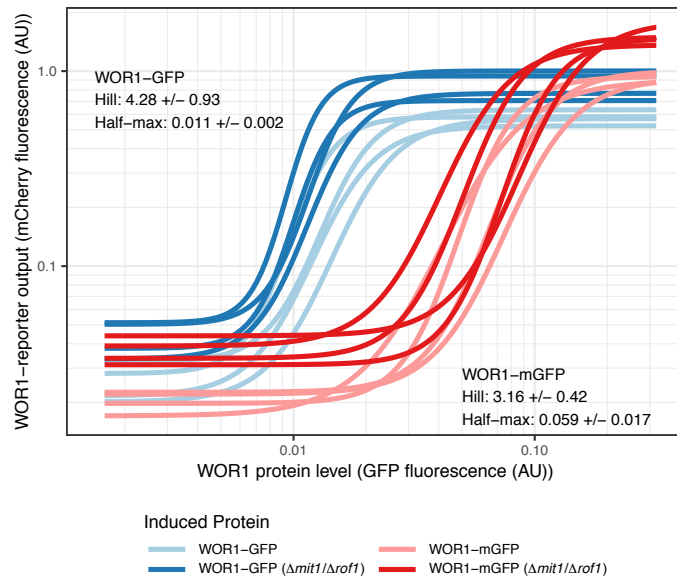

395  
396  
397  
398  
399

400 FIGURE 5 legend – Wor1 autoregulation parameters determined by a synthetic inducible  
401 system in *Saccharomyces cerevisiae*  
402 A) Schematic of experimental design. B) Median GFP (left) or mCherry (right)  
403 fluorescence for strains inducing different proteins in a range of hormone concentrations.  
404 Every set of constructs is represented by four independently constructed strains, each  
405 measured on two different days (with the exception of the Wor1 ( $\Delta mit1/\Delta rof1$ ) strains  
406 which were only measured once). X-axis and Y-axis are logarithmic. C) GFP (Wor1  
407 protein) and mCherry (Wor1 transcriptional activity) fluorescence for individual cells  
408 across hormone concentrations. Data is shown for two strains inducing either Wor1-GFP  
409 (top) or Wor1-mGFP (bottom) measured on one day. Solid line represents fit Hill  
410 equation for each strain. X-axis and Y-axis are logarithmic. D) Fit Hill equation curves  
411 for Wor1 transcription activity of strains inducing either Wor1-GFP (blue) or Wor1-  
412 mGFP (red). Each curve is fit to data measured on one of two different days. Inset text  
413 summarizes parameters for each set of strains (mean +/- standard deviation). X-axis and  
414 Y-axis are logarithmic.  
415  
416  
417

417 Discussion

418

419 The ability of cells to switch between different cellular states, each of which are faithfully  
420 inherited through many rounds of cell division, underlie a wide range of important  
421 phenomena including cell differentiation (Sánchez Alvarado & Yamanaka, 2014),  
422 antibiotic resistance (Kussell, 2005a; Van den Bergh et al., 2017) and cancer progression  
423 (Rosen & Jordan, 2009). The fungal pathogen *Candida albicans* and its close relatives  
424 *Candida dubliniensis* and *Candida tropicalis* all undergo a phenomenon known as white-  
425 opaque switching, whereby two distinct states are stable across many cell divisions, and  
426 switching between them is stochastic (Porman et al., 2011; Pujol et al., 2004). Although  
427 this bistable system has been preserved by selection in these species, the mechanism of  
428 switching and the complete range of physiological roles of the two cell types are topics of  
429 active investigation. It is known that opaque cells are the mating competent cell type  
430 (Miller & Johnson, 2002) and are less susceptible to phagocytosis by macrophages,  
431 potentially promoting immune evasion (Lohse & Johnson, 2008; Sasse et al., 2013).  
432 Recent work has also shown that, due to a specialized secreted protease program, a small  
433 number of opaque cells can promote growth of a large white cell population; thus the two  
434 cell types can act synergistically (Lohse et al., 2020). Aside from its physiological roles,  
435 white-opaque switching has many advantages as a eukaryotic system to study stochastic  
436 phenotypic switching. It exemplifies two crucial phenomena, rare stochastic phenotypic  
437 switching and cell states that are stable through thousands of cell divisions. It shares  
438 many features with bistable networks in multicellular eukaryotes, such as a large number  
439 of transcription factors and long, complex regulatory regions (enhancers). White-opaque  
440 regulators have also been shown to form phase-separated condensates (Frazer et al.,  
441 2020), which are a feature of some mammalian enhancers (Boija et al., 2018). A  
442 particular advantage of studying phenotypic switching and heritability in *C. albicans* is  
443 the relative ease of performing genetic manipulations. By combining genetic  
444 modifications with direct observation of single cells, our goal is to describe in  
445 quantitative terms the molecular mechanisms that underlie cell type switching.

446

447 Positive feedback, encompassing either positive interactions, double negative  
448 interactions, or autocatalysis is necessary, but not sufficient for the creation of bistability  
449 (Ferrell, 2002). To facilitate bistability, the response must incorporate non-linearity, also  
450 known as ultrasensitivity, in order to create sharp transitions from gradual changes  
451 (Ferrell & Ha, 2014). Mechanisms for creating or increasing ultrasensitivity in regulatory  
452 responses include cooperative binding of transcriptional regulators (Ackers et al., 1982;  
453 Burz, 1998; Johnson et al., 1981), protein sequestration of regulators (Buchler & Cross,  
454 2009) and the number of steps in transcriptional cascades (Hooshangi et al., 2005). We  
455 show here that Wor1 regulation of its own promoter is ultrasensitive even in the absence  
456 of other *C. albicans* regulators. The propensity to dimerize added by the GFP causes a  
457 small increase in the steepness of the activation curve but a large reduction in the  
458 activation threshold. It is this large reduction in activation threshold that likely leads to  
459 the large increase in white-opaque switching in *C. albicans* cells that harbor Wor1-GFP.  
460 This observation suggests switching depends on the equilibrium between Wor1  
461 monomers and higher oligomers. While the natural threshold results in rare switching  
462 under standard lab conditions, our results show that switching frequency is easily

463 adjusted by a relatively small change in the propensity of Wor1 to dimerize. Indeed, other  
464 white-opaque regulators may function in a similar manner to the GFP fusion; any  
465 increase in Wor1 multimer formation would produce a large effect on switching and  
466 could amplify a small amount of Wor1 expression. Although many questions remain  
467 concerning the molecular details of Wor1 autoregulation, our results quantify, for the first  
468 time, the ultrasensitivity of the WOR1 control region (enhancer) in response to carefully  
469 measured levels of the Wor1 protein.

470  
471 A particular advantage of our study is the use of microfluidics, which has allowed us to  
472 observe white-opaque switching at a single cell level and at high temporal resolution. The  
473 ability to track single cells and their lineages through time allowed us to make an  
474 unexpected observation, that switching can occur in multiple groups of related cells, even  
475 when these groups are separated by cell divisions that produce cells that do not switch.  
476 The presence of this pattern did not differ between strains containing Wor1-GFP versus  
477 Wor1-mGFP despite different switching frequencies. We can draw two conclusions from  
478 this switching pattern. First, at least two stochastic events are needed for cells to switch  
479 from white to opaque. The first event defines small pedigrees of cells with increased  
480 probability of switching and the second event, which only occurs in a subset of cells in  
481 these pedigrees, directly leads to Wor1 activation and cell switching. Second, when a  
482 complete switching event occurs, several closely related cells in the pedigree switch  
483 simultaneously, a property that may be adaptive. The occurrence of coordinated  
484 switching would be advantageous in situations where the rapid generation of the rare cell  
485 type could be beneficial. For *C. albicans*, increasing the number of opaque cells could be  
486 valuable both for immune evasion or metabolic cooperation with white cells. A similar  
487 switching pattern was observed in a lab-modified galactose utilization pathway in  
488 *Saccharomyces cerevisiae* (Kaufmann et al., 2007). In that study, removal of negative  
489 feedback created a system dominated by a single positive feedback loop and led to cells  
490 stochastically turning on the GAL regulon in the absence of galactose. In a very similar  
491 manner to our observations, the authors saw correlated activation in cell pedigrees, at  
492 times separated by cells not activating GAL expression (Kaufmann et al., 2007). This  
493 comparison suggests these coordinated switching patterns might be a general feature of  
494 eukaryotic bistable systems.

495  
496 One hypothesis to account for our observed correlations among related cells relies on the  
497 stochastic and bursty nature of gene expression (Raj & van Oudenaarden, 2008).  
498 According to this hypothesis, the first stochastic event during white-opaque switching  
499 might be a rare burst of low-level Wor1 transcription in the absence of efficient  
500 translation of Wor1 mRNA. Because no Wor1 is made, this state would be heritable over  
501 only a small number of cell divisions, defining the small pedigrees of cells predisposed to  
502 switch. The second stochastic event could then depend on variation in translation  
503 efficiency (or uneven partitioning during division), with only certain cells in the pedigree  
504 accumulating sufficient Wor1 protein to excite the Wor1 positive feedback loop, leading  
505 to high level Wor1 expression and subsequent cell-type switching. Consistent with this  
506 hypothesis, the Wor1 UTR severely reduces Wor1 protein expression (Guan & Liu,  
507 2015). This hypothesis is subject to explicit testing and will be the focus of future work.  
508



509 Our work has resolved several issues needed for a quantitative molecular understanding  
510 of white-opaque switching and lays the foundation for subsequent hypothesis tests. While  
511 white-opaque switching and the genetic network that controls it are highly complex, it  
512 represents one of only a few cases of a true epigenetic change in a eukaryotic cell that  
513 does not require external signals and is simple enough to be analyzed in detail and  
514 ultimately, understood in great depth.  
515  
516

516 Materials and methods

517

518 ***C. albicans* strain construction**

519 The genetic background for *C. albicans* is SC5314. SNY425 was used as a prototrophic  
520 a/ $\alpha$  reference strain (Noble et al., 2010). For a prototrophic a/ $\Delta$  reference strain, the a  
521 copy of the MTL in SNY250 (Noble & Johnson, 2005) was replaced with a copy of  
522 *ARG4* using pJD1 (Lin et al., 2013). Genetic modifications were created using a *SATI*  
523 marker-based CRISPR protocol targeting *Candida maltosa LEU2* (Nguyen et al., 2017).  
524 Homozygous Wor1-GFP and Wor1-mGFP fusion proteins were created at the  
525 endogenous *WOR1* locus using a combination of two guides encompassing the stop  
526 codon (GGTACTTAGTTGAATTAATA and GTACTTAGTTGAATTAATAC). Donor  
527 DNA was created by restricting plasmids containing the GFP (or mGFP) sequence  
528 flanked by 500 bp of homology to the 3' end of the *WOR1* ORF and 3' UTR (Lohse &  
529 Johnson, 2010). The *WOR1* motif deleted from the *WOR1* promoter consists of three  
530 overlapping binding motifs (17bp, AAAGTTTAAACTTTAAA), found 5802 bp  
531 upstream of the translation start site. A combination of two guides were used for creating  
532 the deletion (GAAATTTATGAAAGACGGGT and ACCAGTAGTGATTCATAAAT),  
533 donor DNA consisted of 90 bp oligos containing 45 bp homology to flanking sequences  
534 with two single bp substitutions to disrupt PAM or guide sequences  
535 (AATAATTAGAGTTTTACAAGAAATTTATGAAAGACGGGTGcGAAATACTATA  
536 AAATAGAGCAATAAATGACAGAACCTAgCAGTAGTGAT).

537

538 ***S. cerevisiae* strain construction**

539 The genetic background for *S. cerevisiae* experiments is S288C. Starting strains were  
540 mating type a or  $\alpha$  with multiple auxotrophies, created by mating FY23 (*leu2 $\Delta$ 1 ura3-52*  
541 *trp1 $\Delta$ 63*) (Winston et al., 1995) and a mating type  $\alpha$  spore of BY4743 (*his3 $\Delta$ 1 leu2 $\Delta$ 0*  
542 *lys2 $\Delta$ 0 met15 $\Delta$ 0 ura3 $\Delta$ 0*) (Brachmann et al., 1998). Subsequent transformations  
543 integrated various constructs in the following order: the chimeric transcription factor,  
544 deletion of the *WOR1* homologs, the induced protein (GFP, Wor1-GFP, Wor1-mGFP or  
545 Wor1) and the *WOR1* transcriptional reporter. Plasmids were constructed using either  
546 restriction digest and subsequent ligation or by using homology based cloning (In-Fusion,  
547 Takara 638911) and were sequence verified, all PCRs utilized a high fidelity polymerase  
548 (CloneAmp HiFi PCR Premix, Takara 639298). Plasmids contained components of the  
549 synthetic inducible system flanked by homology to the intended genomic integration  
550 locus and were restricted prior to transformation. The chimeric transcription factor used  
551 is “Z3PM” (Aranda-Díaz et al., 2017) which consists of the Zif268 DNA binding domain,  
552 hPR ligand binding domain and the yeast Msn2 activation domain. The transcription  
553 factor was expressed from the *S. cerevisiae ADHI* promoter and terminated by the *C.*  
554 *albicans ADHI* terminator. The transcription factor was integrated into *leu2* proceeded by  
555 the *Candida glabrata LEU2* sequence, including promoter and terminator. Induced  
556 proteins were expressed from a modified *GALI* promoter containing three dimeric Zif268  
557 binding sites (Aranda-Díaz et al., 2017) and terminated by the *C. albicans ADHI*  
558 terminator. The proteins were integrated into the *trp1* locus proceeded by the *C. glabrata*  
559 *TRP1* sequence, including promoter and terminator. The *WOR1* homologs (*MITI* and  
560 *ROFI*) were knocked out using a plasmid based CRISPR approach (Ryan et al., 2014). A  
561 plasmid with a 2 $\mu$  origin of replication was constructed that contained Cas9, a KanMX

562 selection cassette and two guides (one for each of the homologs). The guides were  
563 expressed from the *SNR52* and *SUP4* promoters respectively and both were terminated by  
564 a copy of the *SNR52* terminator. Donor DNA consisted of 90bp complementary annealed  
565 oligos (Nguyen et al., 2017) containing 44 bp of homology upstream and downstream of  
566 the ORF, flanking a GG sequence. After verifying both homologs were deleted, cells  
567 were grown overnight in the absence of G418, plated on YPD and replica plated to  
568 YPD+G418 to identify colonies that had lost the *CAS9* containing plasmid. The main  
569 *WOR1* transcriptional reporter consists of 6656 bp of the *WOR1* promoter (ending at a  
570 presumed TATA box, 2048 bp before the translational start site), 115 bp containing the  
571 end of the *CYCI* promoter and its 5' UTR (starting at the "-52" TATA box (Hahn et al.,  
572 1985)) and a fluorescent protein ORF (mCherry or GFP) followed by the *C. albicans*  
573 *ACT1* terminator. An alternative reporter contained an additional 70 bp of the end of the  
574 *WOR1* promoter and 1980 bp encompassing the *WOR1* 5'UTR instead of the *CYCI*  
575 sequence. Transcriptional reporters were preceded by a Hygromycin resistance cassette  
576 and integrated into the *ura3* locus. Integration was achieved using two separate restricted  
577 plasmids simultaneously transformed. One plasmid contained homology upstream to the  
578 *URA3* locus, the Hygromycin cassette and the *WOR1* promoter and beginning of 5' UTR.  
579 The second plasmid contained the end of the *WOR1* promoter, the *CYCI* (or *WOR1*)  
580 5'UTR, the fluorescent protein and terminator and homology downstream to the *URA3*  
581 locus. With one exception, combinations of constructs were represented by two  
582 completely independent strains based on different starting strains (of mating type  $\alpha$  or  $\alpha$ ).  
583 The induced *Wor1* ( $\Delta mit1/\Delta rof1$ ) combination was represented by two mating type  $\alpha$   
584 strains.

585

### 586 **Microscopy and microfluidics**

587 *C. albicans* strains were streaked from frozen stocks on SD+aa+uri plates and incubated  
588 for 5-9 days at 25°C. Colonies were directly diluted to an OD of 0.25 and grown in liquid  
589 SD+aa+uri for 4 hours. Cultures were washed and diluted to approximately  $5 \times 10^6$   
590 cells/ml in PBS without calcium or magnesium and 50ul were loaded into microfluidic  
591 plates. For microfluidic experiments, we used a CellASIC® ONIX microfluidic platform  
592 and corresponding Y04T-04 plates. Each plate contains four separate chambers, each  
593 chamber containing 104 individual traps. Images were captured using a Nikon Ti2-E  
594 microscope equipped with a Photometrics Prime 95B-25mm Camera and a CFI60 Plan  
595 Apochromat Lambda 100x Oil immersion objective lens. Cells were loaded into the plate  
596 chambers using 55.1 kPa of pressure for 5 seconds and media (SD+aa+uri) flow was  
597 started immediately. The media flow program consisted of cycles of three 5 second bursts  
598 of perfusion at 10 kPa from each of six inlet channels followed by an hour of perfusion at  
599 1.7 kPa from each of six inlet channels. Coordinates for fields containing single traps  
600 loaded with at least one cell were manually determined. Nikon NIS Elements software  
601 was used to drive stage movement and acquisition; the Nikon Perfect Focus System was  
602 utilized. Images (DIC and GFP channels) were captured for each field (40-70 per  
603 chamber) every 12 minutes for 24 hours. Temperature was kept at 25°C using an  
604 OKOLab Cage Incubator.

605

606

607

## 608 **Image and data analysis**

609 Custom Matlab scripts were used for image analysis; statistical analysis and data  
610 visualization utilized R (R Core Team, 2019), with extensive use of *tidyverse* (Wickham,  
611 2017). Images were first adjusted to correct for stage movement. Each image was  
612 compared to the previous image in the time series and the optimal geometric  
613 transformation was found to account for any (x,y) movement (Matlab function  
614 *imregtform*). Next, cells were segmented automatically in each image. Cell borders were  
615 identified using a combination of bottom hat filtering, top hat filtering, dilation, erosion  
616 and selection based on object properties (area, perimeter and eccentricity). Individual  
617 cells were tracked through time by manually determining their position in a series of  
618 images; each position was then associated with the corresponding automatically  
619 segmented cell. Pedigree information was also manually determined. For a metric of  
620 Wor1 expression per cell, the 300 highest intensity pixels (in the GFP channel) were  
621 averaged. Typical white cell size is 1,750 pixels; typical opaque cell size is 2,500 pixels.  
622 Cell length (FIGURE 2, FIGURE S2) was determined using Fiji (Schindelin et al., 2012)  
623 by recording the length of a line drawn along the cells long axis. Cell length was recorded  
624 when cells were beginning to bud a new cell. 100 reference white and opaque cells were  
625 recorded. Cell length was recorded for all pairs of switching cells across three  
626 experiments from different days, resulting in 248 mother-daughter pairs of cells  
627 containing Wor1-GFP and 50 pairs of cells containing Wor1-mGFP. For determining if  
628 mixed-fate pedigrees represent two independent switching events, we considered 168  
629 traps loaded with cells containing Wor1-mGFP. The numbers of switching events were  
630 counted in each trap according to three different ways of calculating independent events:  
631 1) every pair of mother-daughter cells are considered independent, 2) pairs of direct  
632 mother-daughter pairs are no longer considered independent, 3) pairs in mixed-fate  
633 pedigrees are also no longer considered independent. We calculated the expected Poisson  
634 probability distribution based on the unambiguous zero-class of 134 traps ( $\lambda = -$   
635  $\log(134/168)$ ). We performed chi-squared goodness-of-fit tests with p-values computed  
636 by Monte Carlo simulations with 2000 replicates.

637

## 638 **Flow cytometry, experiments and data analysis**

639 *S. cerevisiae* strains were streaked from frozen stocks on YPD plates and incubated for 2  
640 days at 30°C. Colonies were inoculated into 3ml of SD+aa+uri media and grown  
641 overnight. Cells were washed, resuspended in PBS without calcium or magnesium and  
642 diluted 1:16 into 96-well plates containing SD+aa+uri with different concentrations of  
643 progesterone. Progesterone was diluted from 2mM stocks (95% Ethanol, 5% DMSO);  
644 lower concentrations were supplemented with Ethanol and DMSO to match the high  
645 concentration. Plates contained 8 experimental strains measured at 10 different  
646 concentrations of progesterone and 3 control strains measured at 4 concentrations of  
647 progesterone. For each set of strains two identical plates were created and incubated,  
648 shaking at 500 RPM at 30°C. After a set incubation time, plates were washed three times  
649 and diluted in PBS without calcium or magnesium with 1mM EDTA. One plate was read  
650 after 4.5 hours of incubation and the second was read at 24 hours. Data from both plates  
651 were similar and the 24-hour readings are presented. Measurements were taken using a  
652 BD FACSCelesta. GFP fluorescence was measured by blue (488nm) excitation and a  
653 530/30 band pass emission filter. mCherry fluorescence was measured by yellow-green

654 (561nm) excitation and a 610/20 band pass emission filter. Flow cytometry data was  
655 analyzed using R (R Core Team, 2019), with extensive use of *tidyverse* (Wickham,  
656 2017). Data was imported into R using *flowCore* (Ellis et al., 2019). Data was filtered to  
657 remove potential cell debris, cell aggregates and contaminants by constructing two gates,  
658 one based on forward and side scatter and a second based on GFP and a violet (405nm)  
659 excitation, 670/30 emission channel. GFP and mCherry measurements were normalized  
660 by forward scatter. Presented data encompass 376 wells with a range of 127-8905 events  
661 per well after filtering (median: 7095.5; 95% of samples have over 4000 events). For  
662 fitting hill equations, we used the *drm* function in the package *drc* (Ritz et al., 2015)  
663 using robust median estimation. mCherry measurements were log<sub>10</sub> transformed and  
664 fitted to a four-parameter log-logistic function with a parameterization converting the  
665 natural log of the half-max value into a parameter. For Wor1-GFP, only data from  
666 progesterone concentrations less than 2nM were used for fitting.

667

668

669 Acknowledgments

670

671 We thank members of the Johnson lab, in particular Matt Lohse and Kyle Fowler for  
672 helpful discussions and Ananda Mendoza for technical support. We thank David  
673 Gresham, Kerry Geiler-Samerotte, Mariana Gomez Schiavon and Ranen Aviner for  
674 advice and the lab of Hana El-Samad and Dmitri Petrov for providing reagents. This  
675 investigation has been aided by a grant from The Jane Coffin Childs Memorial Fund for  
676 Medical Research (to N.Z.).

677

678

678 References  
679

- 680 Acar, M., Mettetal, J. T., & van Oudenaarden, A. (2008). Stochastic switching as a  
681 survival strategy in fluctuating environments. *Nature Genetics*, *40*(4), 471–475.  
682 <https://doi.org/10.1038/ng.110>
- 683 Ackers, G. K., Johnson, A. D., & Shea, M. A. (1982). Quantitative model for gene  
684 regulation by lambda phage repressor. *Proceedings of the National Academy of*  
685 *Sciences*, *79*(4), 1129–1133. <https://doi.org/10.1073/pnas.79.4.1129>
- 686 Alon, U. (2007). Network motifs: Theory and experimental approaches. *Nature Reviews*  
687 *Genetics*, *8*(6), 450–461. <https://doi.org/10.1038/nrg2102>
- 688 Aranda-Díaz, A., Mace, K., Zuleta, I., Harrigan, P., & El-Samad, H. (2017). Robust  
689 Synthetic Circuits for Two-Dimensional Control of Gene Expression in Yeast.  
690 *ACS Synthetic Biology*, *6*(3), 545–554. <https://doi.org/10.1021/acssynbio.6b00251>
- 691 Bergen, M. S., Voss, E., & Soll, D. R. (1990). Switching at the cellular level in the  
692 white—Opaque transition of *Candida albicans*. *Journal of General Microbiology*,  
693 *136*(10), 1925–1936. <https://doi.org/10.1099/00221287-136-10-1925>
- 694 Boija, A., Klein, I. A., Sabari, B. R., Dall’Agnese, A., Coffey, E. L., Zamudio, A. V., Li,  
695 C. H., Shrinivas, K., Manteiga, J. C., Hannett, N. M., Abraham, B. J., Afeyan, L.  
696 K., Guo, Y. E., Rimel, J. K., Fant, C. B., Schuijers, J., Lee, T. I., Taatjes, D. J., &  
697 Young, R. A. (2018). Transcription Factors Activate Genes through the Phase-  
698 Separation Capacity of Their Activation Domains. *Cell*, *175*(7), 1842-1855.e16.  
699 <https://doi.org/10.1016/j.cell.2018.10.042>
- 700 Brachmann, C. B., Davies, A., Cost, G. J., Caputo, E., Li, J., Hieter, P., & Boeke, J. D.  
701 (1998). Designer deletion strains derived from *Saccharomyces cerevisiae* S288C:

- 702 A useful set of strains and plasmids for PCR-mediated gene disruption and other  
703 applications. *Yeast (Chichester, England)*, 14(2), 115–132.  
704 [https://doi.org/10.1002/\(SICI\)1097-0061\(19980130\)14:2<115::AID-](https://doi.org/10.1002/(SICI)1097-0061(19980130)14:2<115::AID-YEA204>3.0.CO;2-2)  
705 [YEA204>3.0.CO;2-2](https://doi.org/10.1002/(SICI)1097-0061(19980130)14:2<115::AID-YEA204>3.0.CO;2-2)
- 706 Buchler, N. E., & Cross, F. R. (2009). Protein sequestration generates a flexible  
707 ultrasensitive response in a genetic network. *Molecular Systems Biology*, 5(1),  
708 272. <https://doi.org/10.1038/msb.2009.30>
- 709 Burz, D. S. (1998). Cooperative DNA-binding by Bicoid provides a mechanism for  
710 threshold-dependent gene activation in the Drosophila embryo. *The EMBO*  
711 *Journal*, 17(20), 5998–6009. <https://doi.org/10.1093/emboj/17.20.5998>
- 712 Çağatay, T., Turcotte, M., Elowitz, M. B., Garcia-Ojalvo, J., & Süel, G. M. (2009).  
713 Architecture-Dependent Noise Discriminates Functionally Analogous  
714 Differentiation Circuits. *Cell*, 139(3), 512–522.  
715 <https://doi.org/10.1016/j.cell.2009.07.046>
- 716 Chickarmane, V., Troein, C., Nuber, U. A., Sauro, H. M., & Peterson, C. (2006).  
717 Transcriptional Dynamics of the Embryonic Stem Cell Switch. *PLoS*  
718 *Computational Biology*, 2(9), e123. <https://doi.org/10.1371/journal.pcbi.0020123>
- 719 Ellis, B., Haaland, P., Hahne, F., Meur, N. L., Gopalakrishnan, N., Spidlen, J., Jiang, M.,  
720 & Finak, G. (2019). *FlowCore: FlowCore: Basic structures for flow cytometry*  
721 *data*.
- 722 Ene, I. V., Lohse, M. B., Vladu, A. V., Morschhäuser, J., Johnson, A. D., & Bennett, R. J.  
723 (2016). Phenotypic Profiling Reveals that *Candida albicans* Opaque Cells  
724 Represent a Metabolically Specialized Cell State Compared to Default White

- 725 Cells. *MBio*, 7(6), e01269-16, /mbio/7/6/e01269-16.atom.
- 726 <https://doi.org/10.1128/mBio.01269-16>
- 727 Ferrell, J. E. (2002). Self-perpetuating states in signal transduction: Positive feedback,  
728 double-negative feedback and bistability. *Current Opinion in Cell Biology*, 14(2),  
729 140–148. [https://doi.org/10.1016/S0955-0674\(02\)00314-9](https://doi.org/10.1016/S0955-0674(02)00314-9)
- 730 Ferrell, J. E., & Ha, S. H. (2014). Ultrasensitivity part III: Cascades, bistable switches,  
731 and oscillators. *Trends in Biochemical Sciences*, 39(12), 612–618.  
732 <https://doi.org/10.1016/j.tibs.2014.10.002>
- 733 Frazer, C., Staples, M. I., Kim, Y., Hirakawa, M., Dowell, M. A., Johnson, N. V.,  
734 Hernday, A. D., Ryan, V. H., Fawzi, N. L., Finkelstein, I. J., & Bennett, R. J.  
735 (2020). Epigenetic cell fate in *Candida albicans* is controlled by transcription  
736 factor condensates acting at super-enhancer-like elements. *Nature Microbiology*,  
737 5(11), 1374–1389. <https://doi.org/10.1038/s41564-020-0760-7>
- 738 Gardner, T. S., Cantor, C. R., & Collins, J. J. (2000). Construction of a genetic toggle  
739 switch in *Escherichia coli*. *Nature*, 403(6767), 339–342.  
740 <https://doi.org/10.1038/35002131>
- 741 Graham, T. G. W., Tabei, S. M. A., Dinner, A. R., & Rebay, I. (2010). Modeling bistable  
742 cell-fate choices in the *Drosophila* eye: Qualitative and quantitative perspectives.  
743 *Development*, 137(14), 2265–2278. <https://doi.org/10.1242/dev.044826>
- 744 Guan, Z., & Liu, H. (2015). The *WOR1* 5' untranslated region regulates white-opaque  
745 switching in *Candida albicans* by reducing translational efficiency: *WOR1* 5'  
746 untranslated region. *Molecular Microbiology*, 97(1), 125–138.  
747 <https://doi.org/10.1111/mmi.13014>



- 748 Hahn, S., Hoar, E. T., & Guarente, L. (1985). Each of three “TATA elements” specifies a  
749 subset of the transcription initiation sites at the CYC-1 promoter of  
750 *Saccharomyces cerevisiae*. *Proceedings of the National Academy of Sciences of*  
751 *the United States of America*, 82(24), 8562–8566.
- 752 Hernday, A. D., Lohse, M. B., Fordyce, P. M., Nobile, C. J., DeRisi, J. L., & Johnson, A.  
753 D. (2013). Structure of the transcriptional network controlling white-opaque  
754 switching in *Candida albicans*. *Molecular Microbiology*, 90(1), 22–35.  
755 <https://doi.org/10.1111/mmi.12329>
- 756 Hooshangi, S., Thiberge, S., & Weiss, R. (2005). Ultrasensitivity and noise propagation  
757 in a synthetic transcriptional cascade. *Proceedings of the National Academy of*  
758 *Sciences*, 102(10), 3581–3586. <https://doi.org/10.1073/pnas.0408507102>
- 759 Johnson, A. D., Poteete, A. R., Lauer, G., Sauer, R. T., Ackers, G. K., & Ptashne, M.  
760 (1981).  $\lambda$  Repressor and cro—Components of an efficient molecular switch.  
761 *Nature*, 294(5838), 217–223. <https://doi.org/10.1038/294217a0>
- 762 Kaufmann, B. B., Yang, Q., Mettetal, J. T., & van Oudenaarden, A. (2007). Heritable  
763 Stochastic Switching Revealed by Single-Cell Genealogy. *PLoS Biology*, 5(9),  
764 e239. <https://doi.org/10.1371/journal.pbio.0050239>
- 765 Kim, J., & Sudbery, P. (2011). *Candida albicans*, a major human fungal pathogen. *The*  
766 *Journal of Microbiology*, 49(2), 171–177. [https://doi.org/10.1007/s12275-011-](https://doi.org/10.1007/s12275-011-1064-7)  
767 1064-7
- 768 Kramer, B. P., Viretta, A. U., Baba, M. D.-E., Aubel, D., Weber, W., & Fussenegger, M.  
769 (2004). An engineered epigenetic transgene switch in mammalian cells. *Nature*  
770 *Biotechnology*, 22(7), 867–870. <https://doi.org/10.1038/nbt980>

- 771 Kussell, E. (2005a). Bacterial Persistence: A Model of Survival in Changing  
772 Environments. *Genetics*, *169*(4), 1807–1814.  
773 <https://doi.org/10.1534/genetics.104.035352>
- 774 Kussell, E. (2005b). Phenotypic Diversity, Population Growth, and Information in  
775 Fluctuating Environments. *Science*, *309*(5743), 2075–2078.  
776 <https://doi.org/10.1126/science.1114383>
- 777 Lin, C.-H., Kabrawala, S., Fox, E. P., Nobile, C. J., Johnson, A. D., & Bennett, R. J.  
778 (2013). Genetic Control of Conventional and Pheromone-Stimulated Biofilm  
779 Formation in *Candida albicans*. *PLoS Pathogens*, *9*(4), e1003305.  
780 <https://doi.org/10.1371/journal.ppat.1003305>
- 781 Lohse, M. B., Brenes, L. R., Ziv, N., Winter, M. B., Craik, C. S., & Johnson, A. D.  
782 (2020). An Opaque Cell-Specific Expression Program of Secreted Proteases and  
783 Transporters Allows Cell-Type Cooperation in *Candida albicans*. *Genetics*,  
784 *genetics.303613.2020*. <https://doi.org/10.1534/genetics.120.303613>
- 785 Lohse, M. B., Ene, I. V., Craik, V. B., Hernday, A. D., Mancera, E., Morschhauser, J.,  
786 Bennett, R. J., & Johnson, A. D. (2016). Systematic Genetic Screen for  
787 Transcriptional Regulators of the *Candida albicans* White-Opaque Switch.  
788 *Genetics*, *203*(4), 1679–1692. <https://doi.org/10.1534/genetics.116.190645>
- 789 Lohse, M. B., & Johnson, A. D. (2008). Differential phagocytosis of white versus opaque  
790 *Candida albicans* by *Drosophila* and mouse phagocytes. *PloS One*, *3*(1), e1473.  
791 <https://doi.org/10.1371/journal.pone.0001473>

- 792 Lohse, M. B., & Johnson, A. D. (2009). White–opaque switching in *Candida albicans*.  
793 *Current Opinion in Microbiology*, 12(6), 650–654.  
794 <https://doi.org/10.1016/j.mib.2009.09.010>
- 795 Lohse, M. B., & Johnson, A. D. (2010). Temporal anatomy of an epigenetic switch in cell  
796 programming: The white-opaque transition of *C. albicans*. *Molecular*  
797 *Microbiology*, 78(2), 331–343. <https://doi.org/10.1111/j.1365-2958.2010.07331.x>
- 798 Lohse, M. B., & Johnson, A. D. (2016). Identification and Characterization of Wor4, a  
799 New Transcriptional Regulator of White-Opaque Switching. *G3&#58;*  
800 *Genes|Genomes|Genetics*, 6(3), 721–729. <https://doi.org/10.1534/g3.115.024885>
- 801 Losick, R., & Desplan, C. (2008). Stochasticity and Cell Fate. *Science*, 320(5872), 65–68.  
802 <https://doi.org/10.1126/science.1147888>
- 803 Maamar, H., & Dubnau, D. (2005). Bistability in the *Bacillus subtilis* K-state  
804 (competence) system requires a positive feedback loop: Bistability in *B. subtilis*  
805 competence. *Molecular Microbiology*, 56(3), 615–624.  
806 <https://doi.org/10.1111/j.1365-2958.2005.04592.x>
- 807 McIsaac, R. S., Gibney, P. A., Chandran, S. S., Benjamin, K. R., & Botstein, D. (2014).  
808 Synthetic biology tools for programming gene expression without nutritional  
809 perturbations in *Saccharomyces cerevisiae*. *Nucleic Acids Research*, 42(6), e48–  
810 e48. <https://doi.org/10.1093/nar/gkt1402>
- 811 Miller, M. G., & Johnson, A. D. (2002). White-opaque switching in *Candida albicans* is  
812 controlled by mating-type locus homeodomain proteins and allows efficient  
813 mating. *Cell*, 110(3), 293–302.

- 814 Nguyen, N., Quail, M. M. F., & Hernday, A. D. (2017). An Efficient, Rapid, and  
815 Recyclable System for CRISPR-Mediated Genome Editing in *Candida albicans*.  
816 *MSphere*, 2(2). <https://doi.org/10.1128/mSphereDirect.00149-17>
- 817 Noble, S. M., French, S., Kohn, L. A., Chen, V., & Johnson, A. D. (2010). Systematic  
818 screens of a *Candida albicans* homozygous deletion library decouple  
819 morphogenetic switching and pathogenicity. *Nature Genetics*, 42(7), 590–598.  
820 <https://doi.org/10.1038/ng.605>
- 821 Noble, S. M., & Johnson, A. D. (2005). Strains and Strategies for Large-Scale Gene  
822 Deletion Studies of the Diploid Human Fungal Pathogen *Candida albicans*.  
823 *Eukaryotic Cell*, 4(2), 298–309. <https://doi.org/10.1128/EC.4.2.298-309.2005>
- 824 Norman, T. M., Lord, N. D., Paulsson, J., & Losick, R. (2015). Stochastic Switching of  
825 Cell Fate in Microbes. *Annual Review of Microbiology*, 69(1), 381–403.  
826 <https://doi.org/10.1146/annurev-micro-091213-112852>
- 827 Park, B. O., Ahrends, R., & Teruel, M. N. (2012). Consecutive Positive Feedback Loops  
828 Create a Bistable Switch that Controls Preadipocyte-to-Adipocyte Conversion.  
829 *Cell Reports*, 2(4), 976–990. <https://doi.org/10.1016/j.celrep.2012.08.038>
- 830 Phillips, G. N. (1997). Structure and dynamics of green fluorescent protein. *Current*  
831 *Opinion in Structural Biology*, 7(6), 821–827. [https://doi.org/10.1016/S0959-](https://doi.org/10.1016/S0959-440X(97)80153-4)  
832 [440X\(97\)80153-4](https://doi.org/10.1016/S0959-440X(97)80153-4)
- 833 Porman, A. M., Alby, K., Hirakawa, M. P., & Bennett, R. J. (2011). Discovery of a  
834 phenotypic switch regulating sexual mating in the opportunistic fungal pathogen  
835 *Candida tropicalis*. *Proceedings of the National Academy of Sciences*, 108(52),  
836 21158–21163. <https://doi.org/10.1073/pnas.1112076109>

- 837 Ptashne, M. (2011). Principles of a switch. *Nature Chemical Biology*, 7(8), 484–487.  
838 <https://doi.org/10.1038/nchembio.611>
- 839 Pujol, C., Daniels, K. J., Lockhart, S. R., Srikantha, T., Radke, J. B., Geiger, J., & Soll,  
840 D. R. (2004). The Closely Related Species *Candida albicans* and *Candida*  
841 *dubliniensis* Can Mate. *Eukaryotic Cell*, 3(4), 1015–1027.  
842 <https://doi.org/10.1128/EC.3.4.1015-1027.2004>
- 843 R Core Team. (2019). *R: A Language and Environment for Statistical Computing*. R  
844 Foundation for Statistical Computing. <https://www.R-project.org/>
- 845 Raj, A., & van Oudenaarden, A. (2008). Nature, Nurture, or Chance: Stochastic Gene  
846 Expression and Its Consequences. *Cell*, 135(2), 216–226.  
847 <https://doi.org/10.1016/j.cell.2008.09.050>
- 848 Ritz, C., Baty, F., Streibig, J. C., & Gerhard, D. (2015). Dose-Response Analysis Using  
849 R. *PLOS ONE*, 10(12), e0146021. <https://doi.org/10.1371/journal.pone.0146021>
- 850 Rosen, J. M., & Jordan, C. T. (2009). The Increasing Complexity of the Cancer Stem Cell  
851 Paradigm. *Science*, 324(5935), 1670–1673.  
852 <https://doi.org/10.1126/science.1171837>
- 853 Ryan, O. W., Skerker, J. M., Maurer, M. J., Li, X., Tsai, J. C., Poddar, S., Lee, M. E.,  
854 DeLoache, W., Dueber, J. E., Arkin, A. P., & Cate, J. H. (2014). Selection of  
855 chromosomal DNA libraries using a multiplex CRISPR system. *ELife*, 3, e03703.  
856 <https://doi.org/10.7554/eLife.03703>
- 857 Sánchez Alvarado, A., & Yamanaka, S. (2014). Rethinking Differentiation: Stem Cells,  
858 Regeneration, and Plasticity. *Cell*, 157(1), 110–119.  
859 <https://doi.org/10.1016/j.cell.2014.02.041>

- 860 Santillán, M., & Mackey, M. C. (2008). Quantitative approaches to the study of  
861 bistability in the *lac* operon of *Escherichia coli*. *Journal of The Royal Society*  
862 *Interface*, 5(suppl\_1). <https://doi.org/10.1098/rsif.2008.0086.focus>
- 863 Sasse, C., Hasenberg, M., Weyler, M., Gunzer, M., & Morschhauser, J. (2013). White-  
864 Opaque Switching of *Candida albicans* Allows Immune Evasion in an  
865 Environment-Dependent Fashion. *Eukaryotic Cell*, 12(1), 50–58.  
866 <https://doi.org/10.1128/EC.00266-12>
- 867 Schindelin, J., Arganda-Carreras, I., Frise, E., Kaynig, V., Longair, M., Pietzsch, T.,  
868 Preibisch, S., Rueden, C., Saalfeld, S., Schmid, B., Tinevez, J.-Y., White, D. J.,  
869 Hartenstein, V., Eliceiri, K., Tomancak, P., & Cardona, A. (2012). Fiji: An open-  
870 source platform for biological-image analysis. *Nature Methods*, 9(7), 676–682.  
871 <https://doi.org/10.1038/nmeth.2019>
- 872 Smits, W. K., Kuipers, O. P., & Veening, J.-W. (2006). Phenotypic variation in bacteria:  
873 The role of feedback regulation. *Nature Reviews Microbiology*, 4(4), 259–271.  
874 <https://doi.org/10.1038/nrmicro1381>
- 875 Stockwell, S. R., Landry, C. R., & Rifkin, S. A. (2015). The yeast galactose network as a  
876 quantitative model for cellular memory. *Molecular BioSystems*, 11(1), 28–37.  
877 <https://doi.org/10.1039/C4MB00448E>
- 878 Sudbery, P., Gow, N., & Berman, J. (2004). The distinct morphogenic states of *Candida*  
879 *albicans*. *Trends in Microbiology*, 12(7), 317–324.  
880 <https://doi.org/10.1016/j.tim.2004.05.008>
- 881 Tuch, B. B., Mitrovich, Q. M., Homann, O. R., Hernday, A. D., Monighetti, C. K., De La  
882 Vega, F. M., & Johnson, A. D. (2010). The Transcriptomes of Two Heritable Cell

- 883 Types Illuminate the Circuit Governing Their Differentiation. *PLoS Genetics*,  
884 6(8), e1001070. <https://doi.org/10.1371/journal.pgen.1001070>
- 885 Van den Bergh, B., Fauvart, M., & Michiels, J. (2017). Formation, physiology, ecology,  
886 evolution and clinical importance of bacterial persisters. *FEMS Microbiology*  
887 *Reviews*, 41(3), 219–251. <https://doi.org/10.1093/femsre/fux001>
- 888 Wernet, M. F., Mazzoni, E. O., Çelik, A., Duncan, D. M., Duncan, I., & Desplan, C.  
889 (2006). Stochastic spineless expression creates the retinal mosaic for colour  
890 vision. *Nature*, 440(7081), 174–180. <https://doi.org/10.1038/nature04615>
- 891 Wickham, H. (2017). *tidyverse: Easily Install and Load the “Tidyverse.”*  
892 <https://CRAN.R-project.org/package=tidyverse>
- 893 Winston, F., Dollard, C., & Ricupero-Hovasse, S. L. (1995). Construction of a set of  
894 convenient *Saccharomyces cerevisiae* strains that are isogenic to S288C. *Yeast*,  
895 11(1), 53–55. <https://doi.org/10.1002/yea.320110107>
- 896 Wu, M., Su, R.-Q., Li, X., Ellis, T., Lai, Y.-C., & Wang, X. (2013). Engineering of  
897 regulated stochastic cell fate determination. *Proceedings of the National Academy*  
898 *of Sciences*, 110(26), 10610–10615. <https://doi.org/10.1073/pnas.1305423110>
- 899 Yang, F., Moss, L. G., & Phillips, G. N. (1996). The molecular structure of green  
900 fluorescent protein. *Nature Biotechnology*, 14(10), 1246–1251.  
901 <https://doi.org/10.1038/nbt1096-1246>
- 902 Zacharias, D. A. (2002). Partitioning of Lipid-Modified Monomeric GFPs into  
903 Membrane Microdomains of Live Cells. *Science*, 296(5569), 913–916.  
904 <https://doi.org/10.1126/science.1068539>

905 Zordan, R. E., Galgoczy, D. J., & Johnson, A. D. (2006). Epigenetic properties of white-  
906 opaque switching in *Candida albicans* are based on a self-sustaining  
907 transcriptional feedback loop. *Proceedings of the National Academy of Sciences*,  
908 *103*(34), 12807–12812. <https://doi.org/10.1073/pnas.0605138103>

909 Zordan, R. E., Miller, M. G., Galgoczy, D. J., Tuch, B. B., & Johnson, A. D. (2007).  
910 Interlocking Transcriptional Feedback Loops Control White-Opaque Switching in  
911 *Candida albicans*. *PLoS Biology*, *5*(10), e256.  
912 <https://doi.org/10.1371/journal.pbio.0050256>

913  
914



### White to Opaque switching

| Genotype            | Plates     | Colonies | Sectors | Percent Switch    | Fold Change |
|---------------------|------------|----------|---------|-------------------|-------------|
| WT                  | 11 (3,3,5) | 1340     | 17      | 1.27 (+/- 0.306)  | -           |
| Wor1 motif deletion | 11 (3,3,5) | 1790     | 8       | 0.447 (+/- 0.158) | 2.83 down   |
| Wor1-GFP            | 11 (3,3,5) | 948      | 491     | 51.8 (+/- 1.62)   | 40.8 up     |
| Wor1-mGFP           | 11 (3,3,5) | 1603     | 31      | 1.93 (+/- 0.344)  | 1.52 up     |

### Opaque to White switching

| Genotype            | Plates     | Colonies | Sectors | Percent Switch   | Fold Change |
|---------------------|------------|----------|---------|------------------|-------------|
| WT                  | 11 (3,3,5) | 1926     | 87      | 4.52 (+/- 0.473) | -           |
| Wor1 motif deletion | 11 (3,3,5) | 1159     | 224     | 19.3 (+/- 1.16)  | 4.28 up     |
| Wor1-GFP            | 11 (3,3,5) | 1633     | 0       | <0.06            | >75 down    |
| Wor1-mGFP           | 11 (3,3,5) | 1707     | 52      | 3.05 (+/- 0.42)  | 1.48 down   |

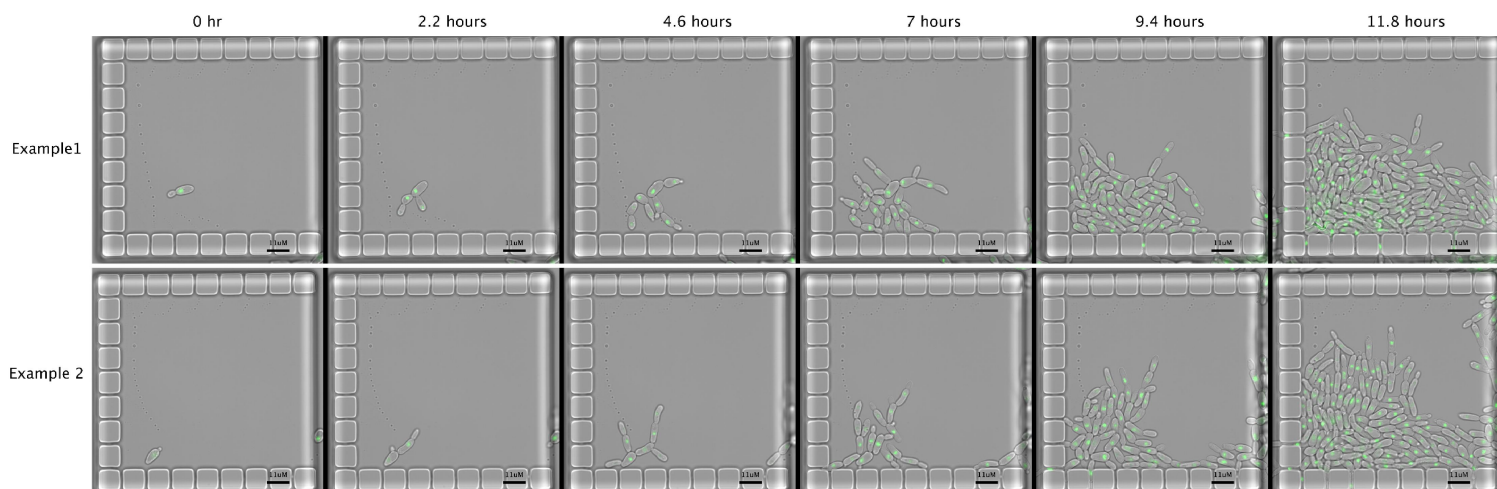

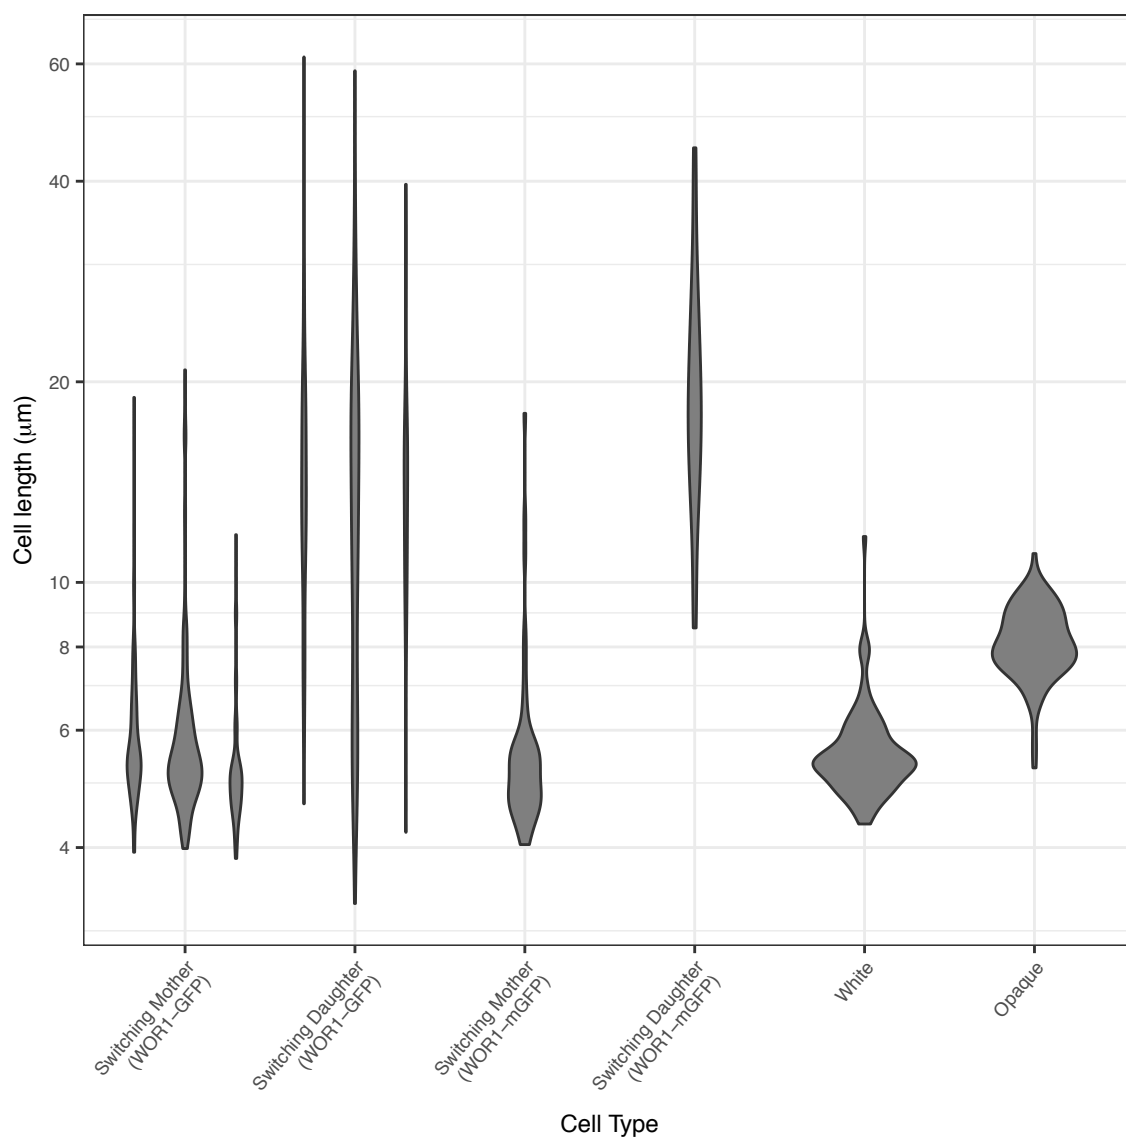

**A**

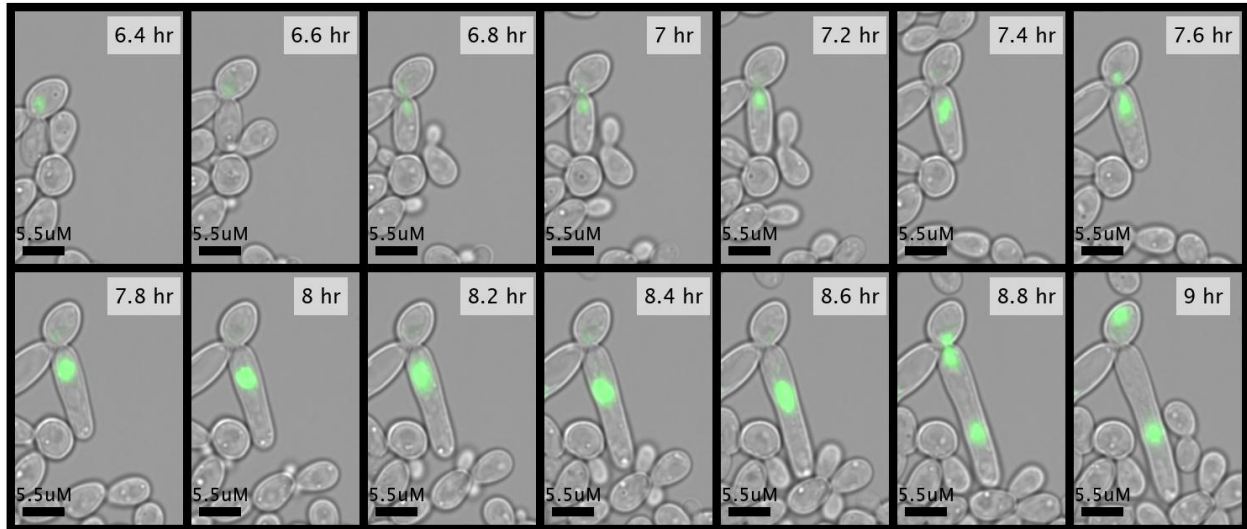

**B**

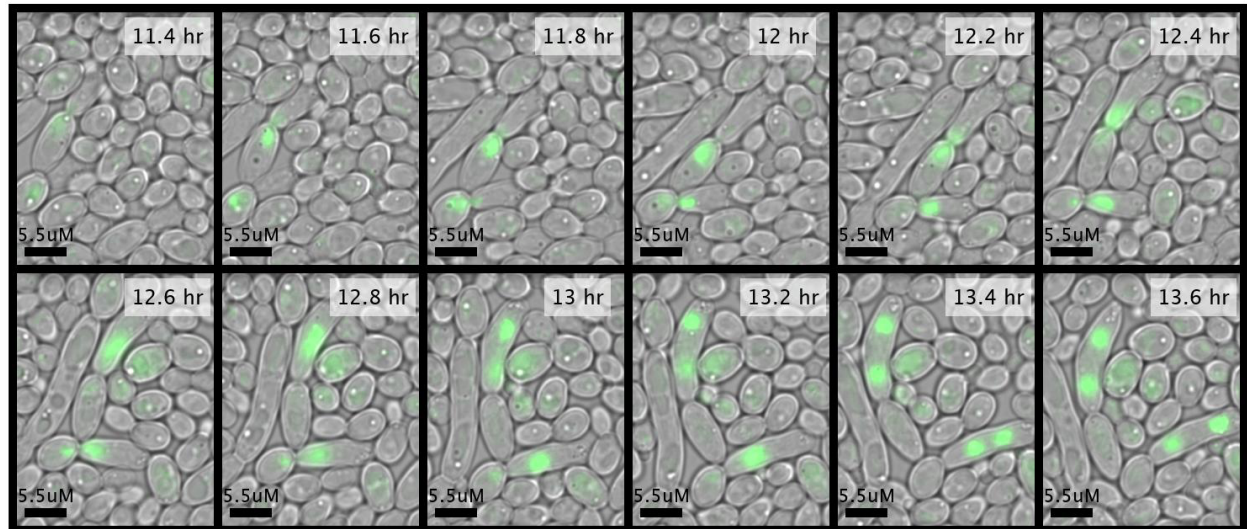

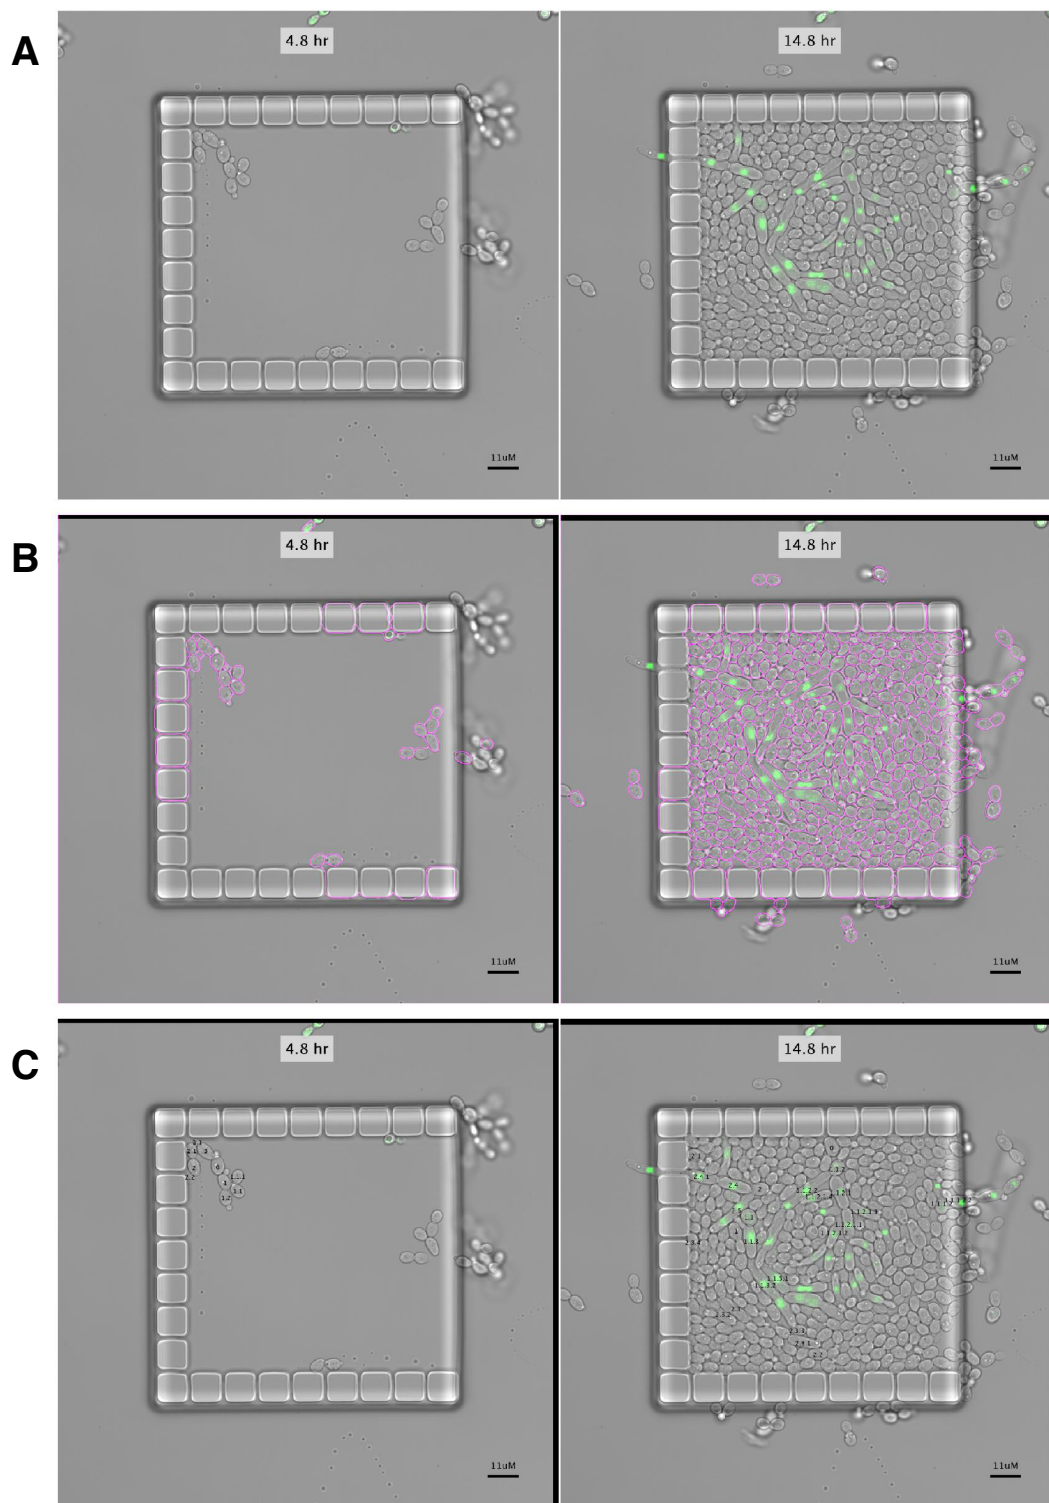

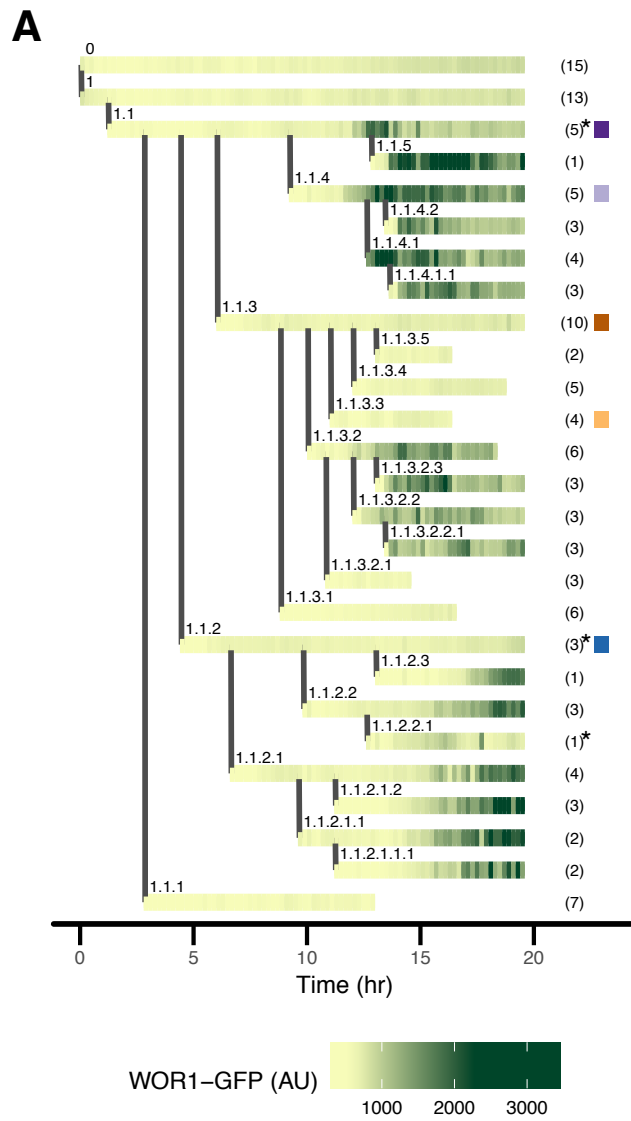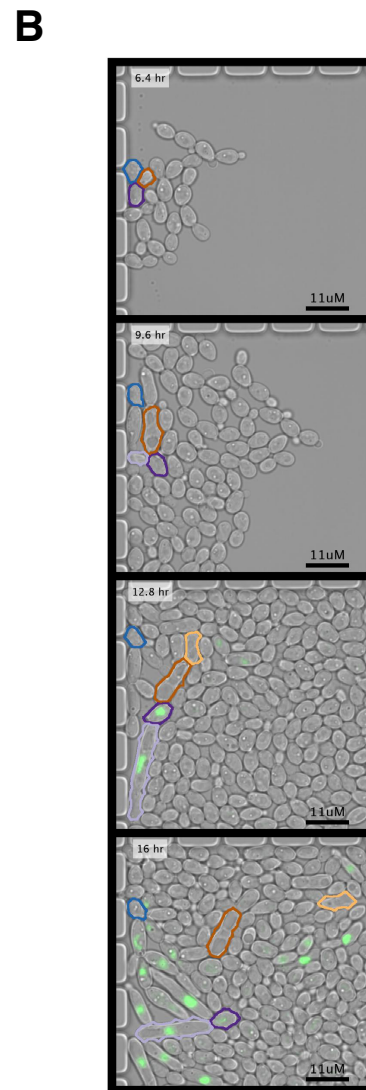

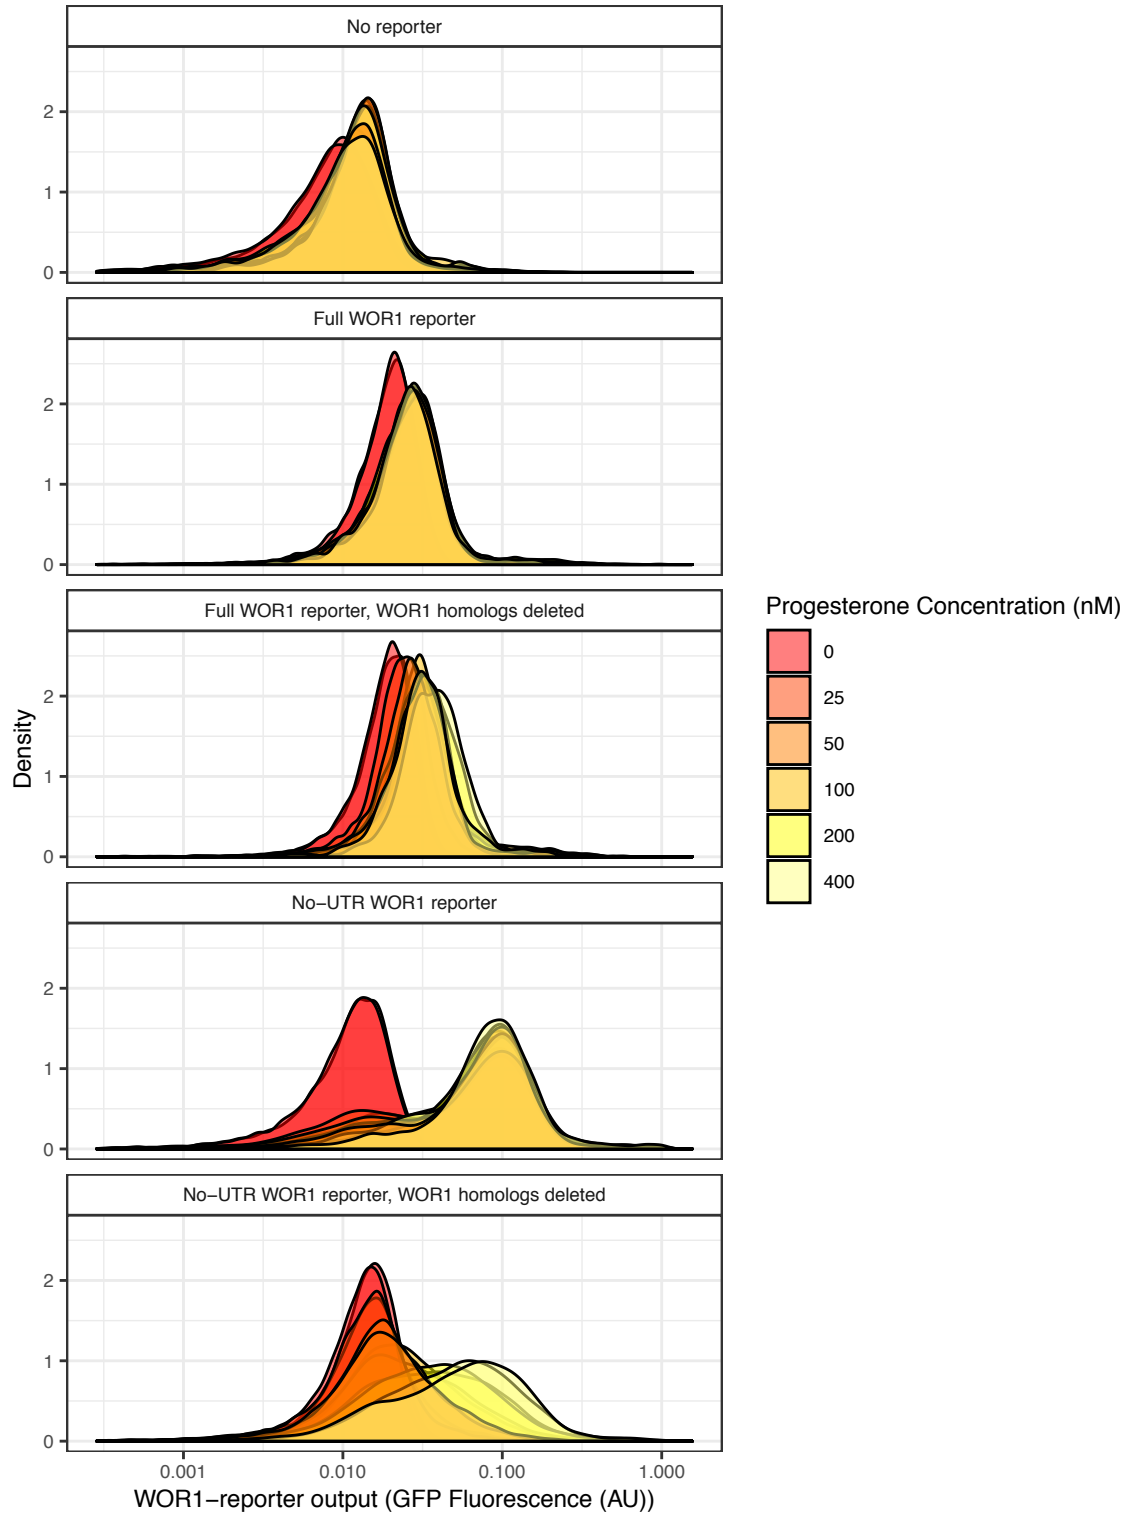

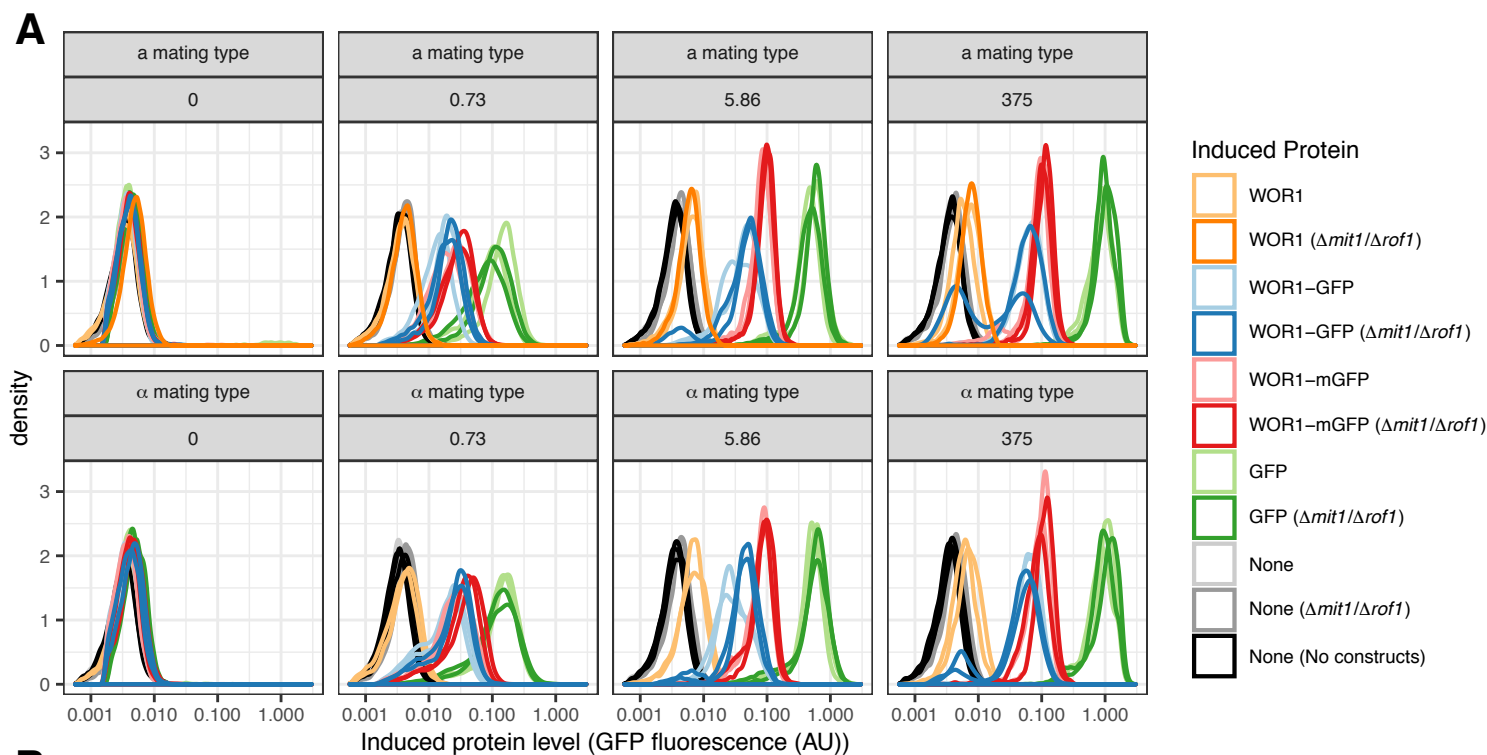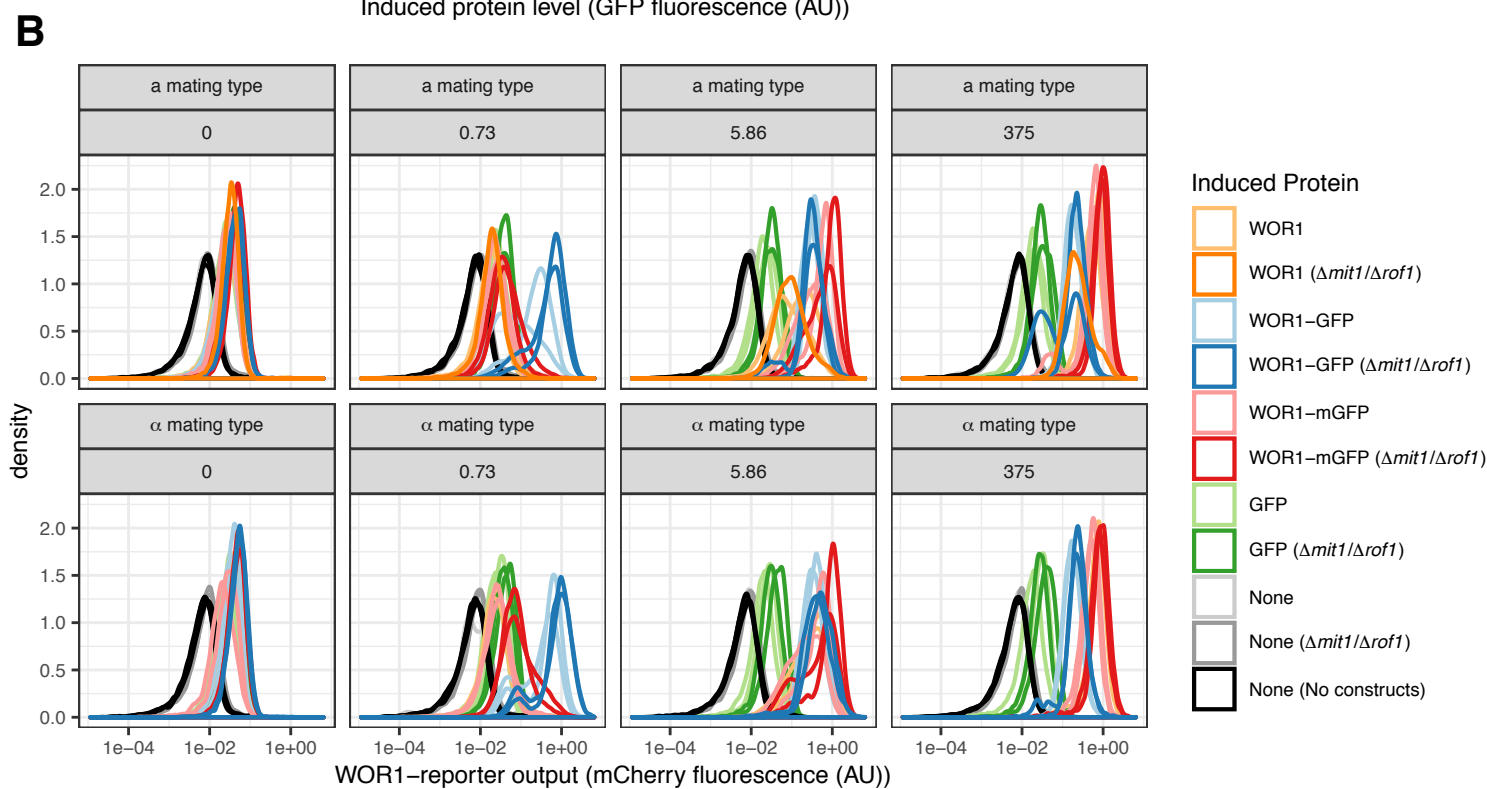



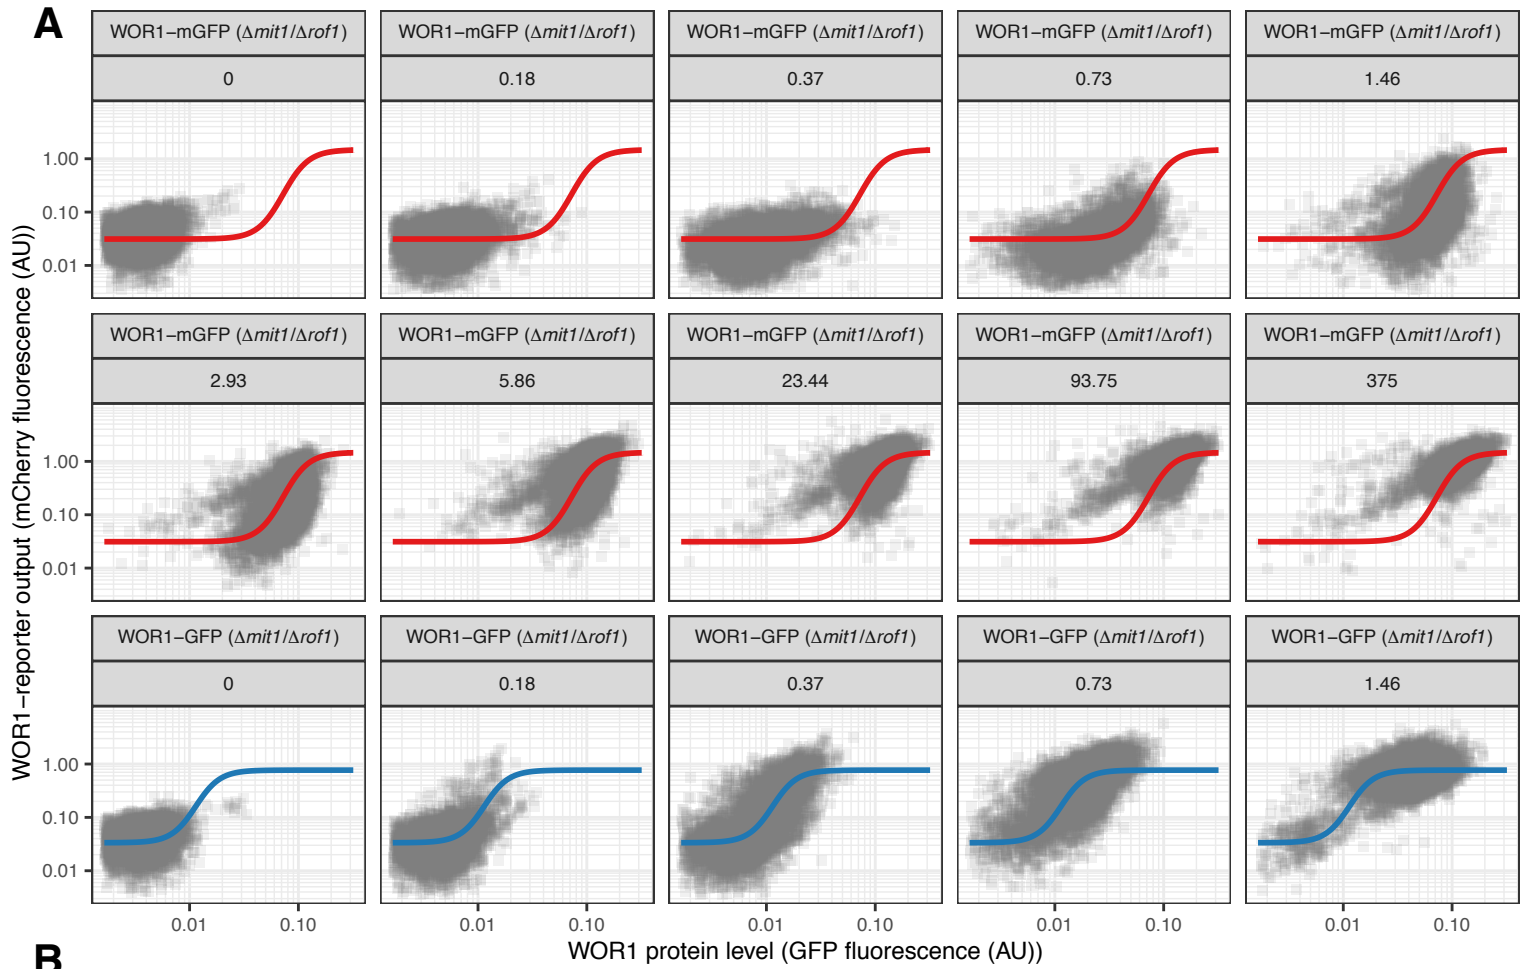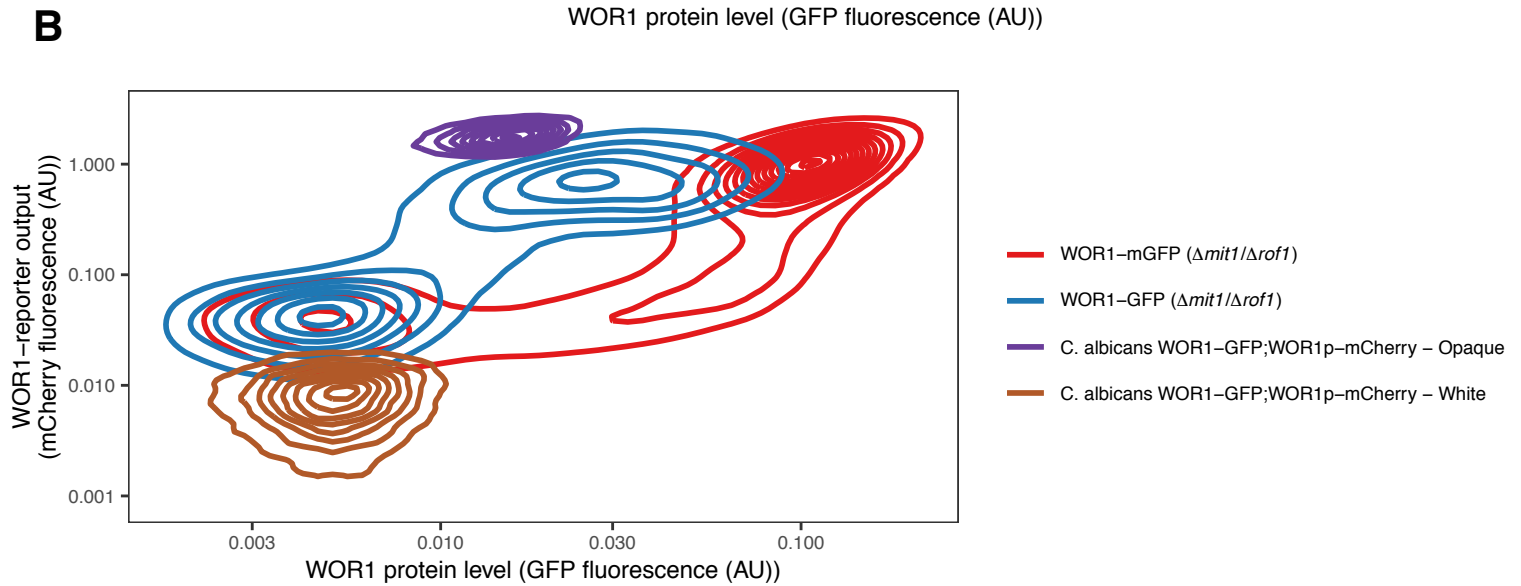

Source: http://biorxiv.org/content/10.1101/2021.09.23.461488v1.full.pdf
